# Supplementary material for: Identification of antioxidant peptides after digestion and absorption of isinglass by serum peptidomics and cellular antioxidant activity analysis
Source: Royal Society of Chemistry journal article supplement (doi:10.1039/d2fo03847a), 2023-01-01

Fig.1

| 格式:<br>已分组 |           | 组 A         |             |             |
|------------|-----------|-------------|-------------|-------------|
|            |           | SOD         |             |             |
|            |           | A:1         | A:2         | A:3         |
| 1          | Control   | 8.96384151  | 9.05284471  | 8.90828190  |
| 2          | Isinglass | 10.21798000 | 10.74034000 | 10.36232000 |
| 3          | 标题        |             |             |             |

  

| 格式:<br>已分组 |           | 组 A      |          |          |
|------------|-----------|----------|----------|----------|
|            |           | CAT      |          |          |
|            |           | A:1      | A:2      | A:3      |
| 1          | Control   | 25.72724 | 25.69616 | 26.98556 |
| 2          | Isinglass | 26.47932 | 27.26845 | 28.81018 |
| 2          | 标题        |          |          |          |

  

| 格式:<br>已分组 |           | 组 A      |          |          |
|------------|-----------|----------|----------|----------|
|            |           | MDA      |          |          |
|            |           | A:1      | A:2      | A:3      |
| 1          | Control   | 0.991787 | 0.811520 | 1.016124 |
| 2          | Isinglass | 0.910263 | 0.980969 | 0.848690 |

Fig.2

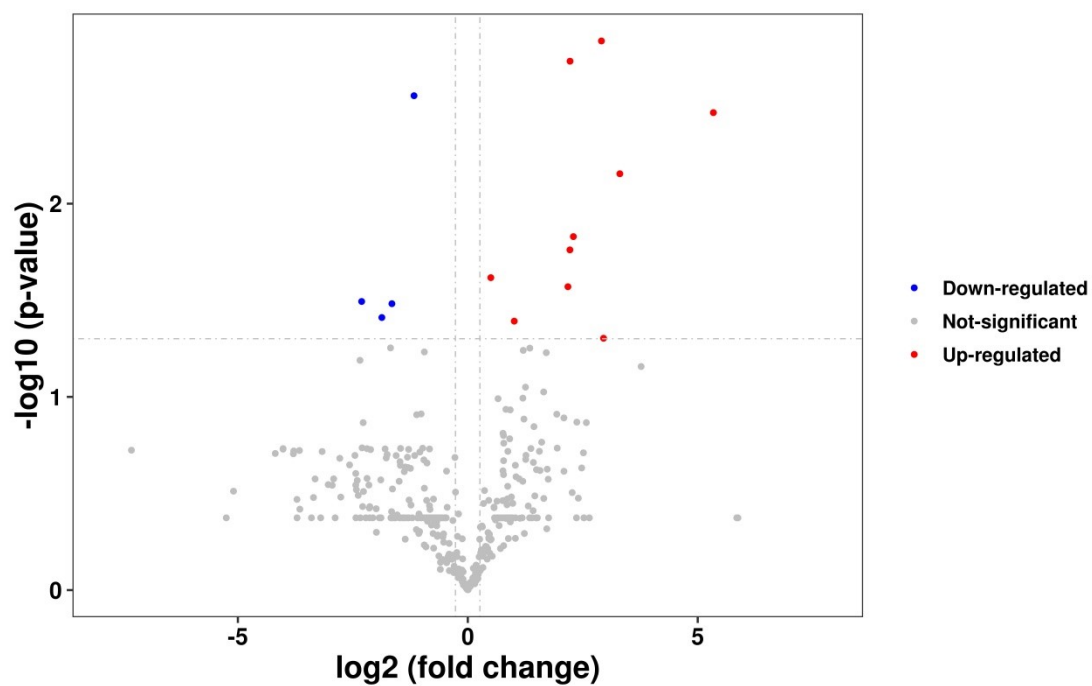

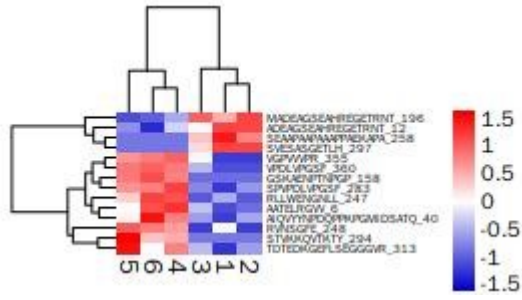

Fig.3

Hydroxyl

| 格式<br>已分组 | 组 A      |          |          | 组 B      |          |          | 组 C      |          |          | 组 D      |          |          |
|-----------|----------|----------|----------|----------|----------|----------|----------|----------|----------|----------|----------|----------|
|           | P1       |          |          | P2       |          |          | P3       |          |          | P4       |          |          |
|           | A:1      | A:2      | A:3      | B:1      | B:2      | B:3      | C:1      | C:2      | C:3      | D:1      | D:2      | D:3      |
| 1 12.5    | 32.72727 | 25.92593 | 25.45455 | 43.63636 | 42.59259 | 43.63636 | 40.00000 | 40.74074 | 43.63636 | 43.63636 | 44.44444 | 43.63636 |
| 2 25      | 30.90909 | 33.33333 | 27.27273 | 47.27273 | 46.29630 | 41.81818 | 40.00000 | 40.74074 | 36.36364 | 45.45455 | 44.44444 | 43.63636 |
| 3 50      | 40.00000 | 33.33333 | 32.72727 | 45.45455 | 50.00000 | 45.45455 | 41.81818 | 46.29630 | 41.81818 | 50.90909 | 48.14815 | 36.36364 |
| 4 100     | 40.00000 | 37.03704 | 36.36364 | 49.09091 | 46.29630 | 38.18182 | 54.54545 | 48.14815 | 43.63636 | 50.90909 | 48.14815 | 40.00000 |
| 5 200     | 45.45455 | 42.59259 | 41.81818 | 49.09091 | 46.29630 | 41.81818 | 50.90909 | 53.70370 | 38.18182 | 45.45455 | 42.59259 | 49.09091 |
| 6 400     | 47.27273 | 44.44444 | 43.63636 | 52.72727 | 57.40741 | 49.09091 | 50.90909 | 51.85185 | 49.09091 | 49.09091 | 51.85185 | 47.27273 |

DPPH

| 格式<br>已分组 | 组 A       |          |           | 组 B       |          |           | 组 C       |          |           | 组 D      |          |          |
|-----------|-----------|----------|-----------|-----------|----------|-----------|-----------|----------|-----------|----------|----------|----------|
|           | P1        |          |           | P2        |          |           | P3        |          |           | P4       |          |          |
|           | A:1       | A:2      | A:3       | B:1       | B:2      | B:3       | C:1       | C:2      | C:3       | D:1      | D:2      | D:3      |
| 1 12.5    | 0.909091  | 3.539823 | 5.263158  | 5.454545  | 5.309735 | 3.508772  | 4.545455  | 0.884956 | 1.754386  | 14.54545 | 7.07965  | 7.01754  |
| 2 25      | 0.000000  | 6.194690 | 6.140351  | 7.272727  | 4.424779 | 4.385965  | 8.181818  | 5.309735 | 2.631579  | 13.63636 | 9.73451  | 7.01754  |
| 3 50      | 7.272727  | 7.079646 | 7.017544  | 8.181818  | 6.194690 | 7.017544  | 8.181818  | 4.424779 | 4.385965  | 17.27273 | 9.73451  | 4.38597  |
| 4 100     | 9.090909  | 7.079646 | 7.017544  | 12.727270 | 6.194690 | 3.508772  | 9.090909  | 4.424779 | 5.263158  | 16.36364 | 9.73451  | 8.77193  |
| 5 200     | 10.909090 | 5.309735 | 8.771930  | 4.545455  | 8.849558 | 10.526320 | 12.727270 | 5.309735 | 3.508772  | 18.18182 | 12.38938 | 12.28070 |
| 6 400     | 10.909090 | 9.734513 | 11.403510 | 10.000000 | 4.424779 | 11.403510 | 7.272727  | 4.424779 | 10.526320 | 20.00000 | 17.69912 | 18.42105 |

ABTS

| 格式<br>已分组 | 组 A      |          |          | 组 B      |          |          | 组 C      |          |          | 组 D      |          |          |
|-----------|----------|----------|----------|----------|----------|----------|----------|----------|----------|----------|----------|----------|
|           | P1       |          |          | P2       |          |          | P3       |          |          | P4       |          |          |
|           | A:1      | A:2      | A:3      | B:1      | B:2      | B:3      | C:1      | C:2      | C:3      | D:1      | D:2      | D:3      |
| 1 12.5    | 35.43506 | 34.60076 | 34.55696 | 33.54351 | 33.84030 | 34.55696 | 33.92182 | 33.33333 | 33.29114 | 33.92182 | 31.81242 | 35.06329 |
| 2 25      | 36.19168 | 36.24842 | 36.20253 | 33.03909 | 33.20659 | 34.30380 | 33.79571 | 33.84030 | 33.54430 | 34.93064 | 34.34728 | 34.55696 |
| 3 50      | 37.32661 | 35.86819 | 36.58228 | 33.54351 | 33.71356 | 34.30380 | 34.30013 | 33.71356 | 33.54430 | 35.18285 | 34.22053 | 34.93671 |
| 4 100     | 40.98361 | 39.92395 | 40.63291 | 34.30013 | 33.07985 | 34.43038 | 35.18285 | 34.22053 | 32.78481 | 34.04792 | 35.23447 | 35.94937 |
| 5 200     | 46.27995 | 46.00760 | 45.18987 | 34.17402 | 33.33333 | 33.79747 | 34.80454 | 33.71356 | 34.05063 | 35.81337 | 34.72750 | 35.06329 |
| 6 400     | 56.62043 | 56.14702 | 56.58228 | 34.55233 | 34.72750 | 34.93671 | 34.93064 | 33.84030 | 34.81013 | 39.47037 | 40.43093 | 37.34177 |
| 7 标题      |          |          |          |          |          |          |          |          |          |          |          |          |

Fe<sup>2+</sup>

| 格式<br>已分组 | 组 A       |          |          | 组 B      |          |          | 组 C      |          |          | 组 D      |          |          |
|-----------|-----------|----------|----------|----------|----------|----------|----------|----------|----------|----------|----------|----------|
|           | P1        |          |          | P2       |          |          | P3       |          |          | P4       |          |          |
|           | A:1       | A:2      | A:3      | B:1      | B:2      | B:3      | C:1      | C:2      | C:3      | D:1      | D:2      | D:3      |
| 1 12.5    | 3.910615  | 2.234637 | 3.389831 | 2.793296 | 2.793296 | 1.129944 | 3.351955 | 4.469274 | 4.519774 | 0.000000 | 2.234637 | 3.389831 |
| 2 25      | 4.469274  | 4.469274 | 3.954802 | 2.793296 | 2.234637 | 1.694915 | 6.703911 | 2.234637 | 3.389831 | 3.351955 | 3.351955 | 0.000000 |
| 3 50      | 5.027933  | 5.027933 | 2.824859 | 5.027933 | 2.234637 | 1.694915 | 5.027933 | 1.675978 | 5.649718 | 5.027933 | 5.027933 | 1.694915 |
| 4 100     | 6.145251  | 5.027933 | 6.779661 | 5.586592 | 6.145251 | 2.259887 | 6.145251 | 4.469274 | 3.389831 | 4.469274 | 5.586592 | 3.389831 |
| 5 200     | 5.586592  | 7.821229 | 6.214689 | 7.821229 | 4.469274 | 0.564972 | 5.027933 | 6.145251 | 3.954802 | 6.145251 | 3.910615 | 3.389831 |
| 6 400     | 10.056870 | 9.497207 | 5.084746 | 6.703911 | 4.469274 | 3.954802 | 5.586592 | 6.145251 | 5.649718 | 6.703911 | 5.586592 | 6.779661 |

Fig.4

P1

| 格式:<br>已分组 |         | 组 A       |           |           | 组 B       |           |           |
|------------|---------|-----------|-----------|-----------|-----------|-----------|-----------|
|            |         | 24 h      |           |           | 48 h      |           |           |
|            |         | A:1       | A:2       | A:3       | B:1       | B:2       | B:3       |
| 1          | Control | 103.20830 | 96.36719  | 99.67764  | 100.23190 | 95.53719  | 97.96610  |
| 2          | Model   | 64.02778  | 62.17448  | 61.78643  | 60.71429  | 71.25382  | 66.66667  |
| 3          | 12.5    | 116.45830 | 100.58590 | 91.73942  | 155.51950 | 117.73700 | 112.06350 |
| 4          | 25      | 133.24380 | 102.13330 | 110.94180 | 118.18180 | 96.33028  | 86.98413  |
| 5          | 50      | 95.16454  | 106.20000 | 146.46810 | 117.85710 | 104.89300 | 120.31750 |
| 6          | 100     | 112.49160 | 101.86670 | 103.60110 | 113.31170 | 115.90210 | 128.57140 |
| 7          | 200     | 106.78310 | 129.60000 | 107.89470 | 153.57140 | 159.63300 | 164.12700 |
| 8          | 400     | 98.05556  | 107.94270 | 99.26125  | 124.02600 | 166.97250 | 173.01590 |

P2

| 格式:<br>已分组 |         | 组 A       |           |           | 组 B       |           |           |
|------------|---------|-----------|-----------|-----------|-----------|-----------|-----------|
|            |         | 24 h      |           |           | 48 h      |           |           |
|            |         | A:1       | A:2       | A:3       | B:1       | B:2       | B:3       |
| 1          | Control | 103.20830 | 96.36719  | 99.67764  | 100.23190 | 95.53719  | 97.96610  |
| 2          | Model   | 64.02778  | 62.17448  | 61.78643  | 60.71429  | 71.25382  | 66.66667  |
| 3          | 12.5    | 102.98610 | 116.66670 | 139.01950 | 112.01300 | 100.00000 | 124.76190 |
| 4          | 25      | 124.02340 | 107.32030 | 95.26667  | 145.12990 | 151.98780 | 197.46030 |
| 5          | 50      | 103.81940 | 77.53906  | 101.20890 | 105.84420 | 124.15900 | 133.96830 |
| 6          | 100     | 83.75000  | 86.65365  | 62.59234  | 123.37660 | 119.26610 | 93.65079  |
| 7          | 200     | 99.73958  | 99.05977  | 103.93330 | 107.79220 | 117.43120 | 97.14286  |
| 8          | 400     | 94.93056  | 90.42969  | 62.99530  | 80.51948  | 62.99694  | 69.84127  |

P3

| 格式:<br>已分组 |         | 组 A       |           |           | 组 B       |           |           |
|------------|---------|-----------|-----------|-----------|-----------|-----------|-----------|
|            |         | 24 h      |           |           | 48 h      |           |           |
|            |         | A:1       | A:2       | A:3       | B:1       | B:2       | B:3       |
| 1          | Control | 103.20830 | 96.36719  | 99.67764  | 100.23190 | 95.53719  | 97.96610  |
| 2          | Model   | 64.02778  | 62.17448  | 61.78643  | 60.71429  | 71.25382  | 66.66667  |
| 3          | 12.5    | 100.97660 | 98.92545  | 121.06670 | 225.00000 | 205.19880 | 201.58730 |
| 4          | 25      | 67.42780  | 113.66670 | 107.89470 | 122.40260 | 104.28130 | 119.68250 |
| 5          | 50      | 78.12500  | 67.56212  | 108.86670 | 190.25970 | 143.11930 | 174.92060 |
| 6          | 100     | 76.45833  | 84.70052  | 84.48623  | 140.58440 | 138.83790 | 127.61900 |
| 7          | 200     | 72.13542  | 83.00873  | 86.20000  | 203.57140 | 188.37920 | 198.73020 |
| 8          | 400     | 75.34722  | 81.57552  | 85.69510  | 201.29870 | 187.46180 | 193.01590 |
| 9          | 标题      |           |           |           |           |           |           |



P4

| 格式:<br>已分组 |         | 组 A       |          |          | 组 B       |           |           |
|------------|---------|-----------|----------|----------|-----------|-----------|-----------|
|            |         | 24 h      |          |          | 48 h      |           |           |
|            | ✕       | A:1       | A:2      | A:3      | B:1       | B:2       | B:3       |
| 1          | Control | 103.20830 | 96.36719 | 99.67764 | 100.23190 | 95.53719  | 97.96610  |
| 2          | Model   | 64.02778  | 62.17448 | 61.78643 | 60.71429  | 71.25382  | 66.66667  |
| 3          | 12.5    | 48.47222  | 49.67448 | 72.39758 | 165.90910 | 182.26300 | 193.01590 |
| 4          | 25      | 106.18060 | 63.15104 | 88.58294 | 216.88310 | 165.13760 | 206.03170 |
| 5          | 50      | 49.02778  | 76.56250 | 67.76360 | 134.41560 | 126.60550 | 184.76190 |
| 6          | 100     | 82.08333  | 86.52344 | 73.13633 | 103.24680 | 105.50460 | 127.61900 |
| 7          | 200     | 55.48611  | 56.01075 | 45.22161 | 140.58440 | 136.69720 | 148.88890 |
| 8          | 400     | 68.61111  | 58.59375 | 49.96642 | 37.66234  | 51.37615  | 46.98413  |
| 9          | 标题      |           |          |          |           |           |           |

Fig.5

| 格式:<br>已分组 |                               | 组 A          |              |              |
|------------|-------------------------------|--------------|--------------|--------------|
|            |                               | SOD          |              |              |
|            | ✕                             | A:1          | A:2          | A:3          |
| 1          | Control                       | 8.233147434  | 7.110162528  | 7.739853519  |
| 2          | H <sub>2</sub> O <sub>2</sub> | 12.369700970 | 15.631737760 | 18.467724130 |
| 3          | P1                            | 18.184171330 | 18.042693570 | 17.575461500 |

| 格式:<br>已分组 |                               | 组 A          |              |              |
|------------|-------------------------------|--------------|--------------|--------------|
|            |                               | CAT          |              |              |
|            | ✕                             | A:1          | A:2          | A:3          |
| 1          | Control                       | 5.281407754  | 4.536989666  | 8.569392687  |
| 2          | H <sub>2</sub> O <sub>2</sub> | 8.932692908  | 12.183646140 | 9.022604261  |
| 3          | P1                            | 15.148216870 | 15.666182150 | 17.996526420 |
| 4          | 标题                            |              |              |              |

| 格式:<br>已分组 |                               | 组 A      |          |          |
|------------|-------------------------------|----------|----------|----------|
|            |                               | MDA      |          |          |
|            | ✕                             | A:1      | A:2      | A:3      |
| 1          | Control                       | 0.674726 | 0.665868 | 0.599353 |
| 2          | H <sub>2</sub> O <sub>2</sub> | 1.242045 | 1.593539 | 1.197212 |
| 3          | P1                            | 0.842305 | 0.840413 | 1.133212 |

| 格式:<br>已分组 |                               | 组 A         |             |             |
|------------|-------------------------------|-------------|-------------|-------------|
|            |                               | ROS         |             |             |
|            | ✕                             | A:1         | A:2         | A:3         |
| 1          | Control                       | 1.026092759 | 1.029183000 | 1.011912000 |
| 2          | H <sub>2</sub> O <sub>2</sub> | 1.123790457 | 1.113788000 | 1.083580000 |
| 3          | P1                            | 1.019019019 | 1.091365000 | 1.044752000 |
| 4          | 标题                            |             |             |             |

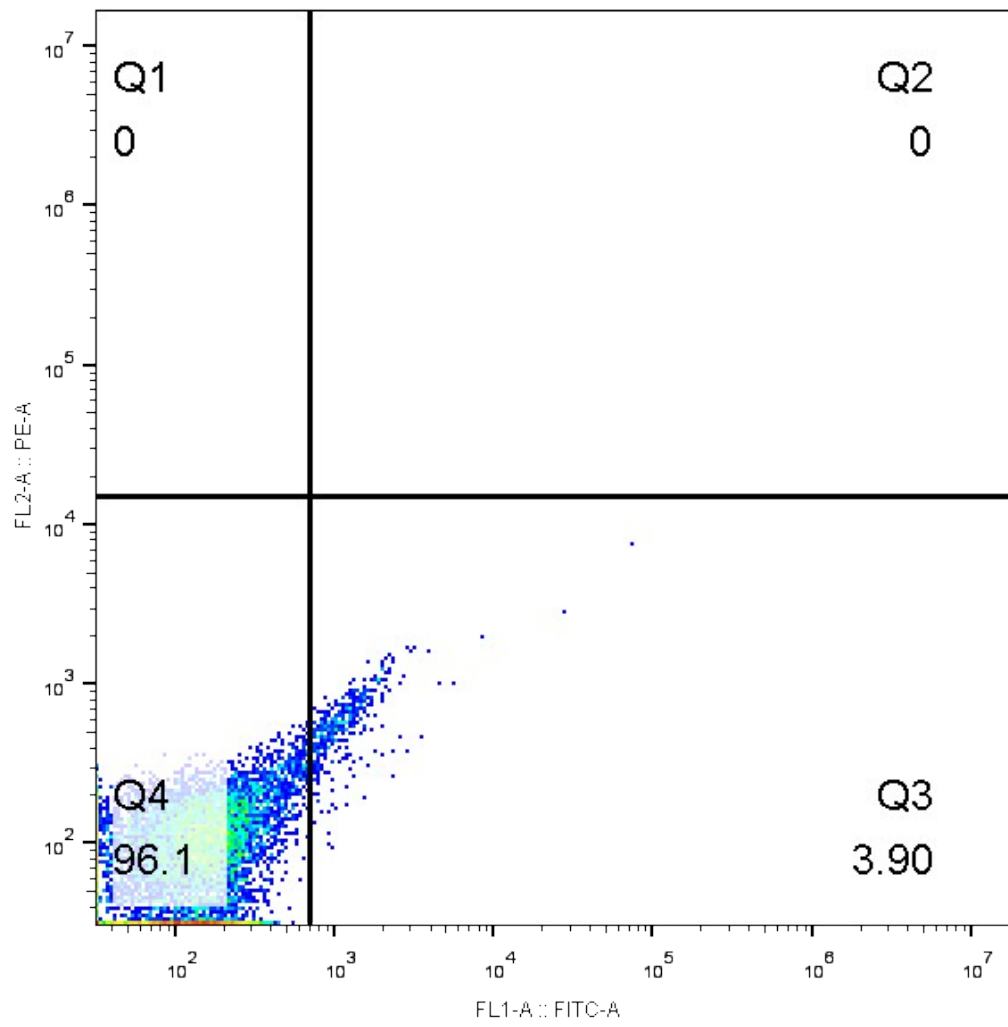

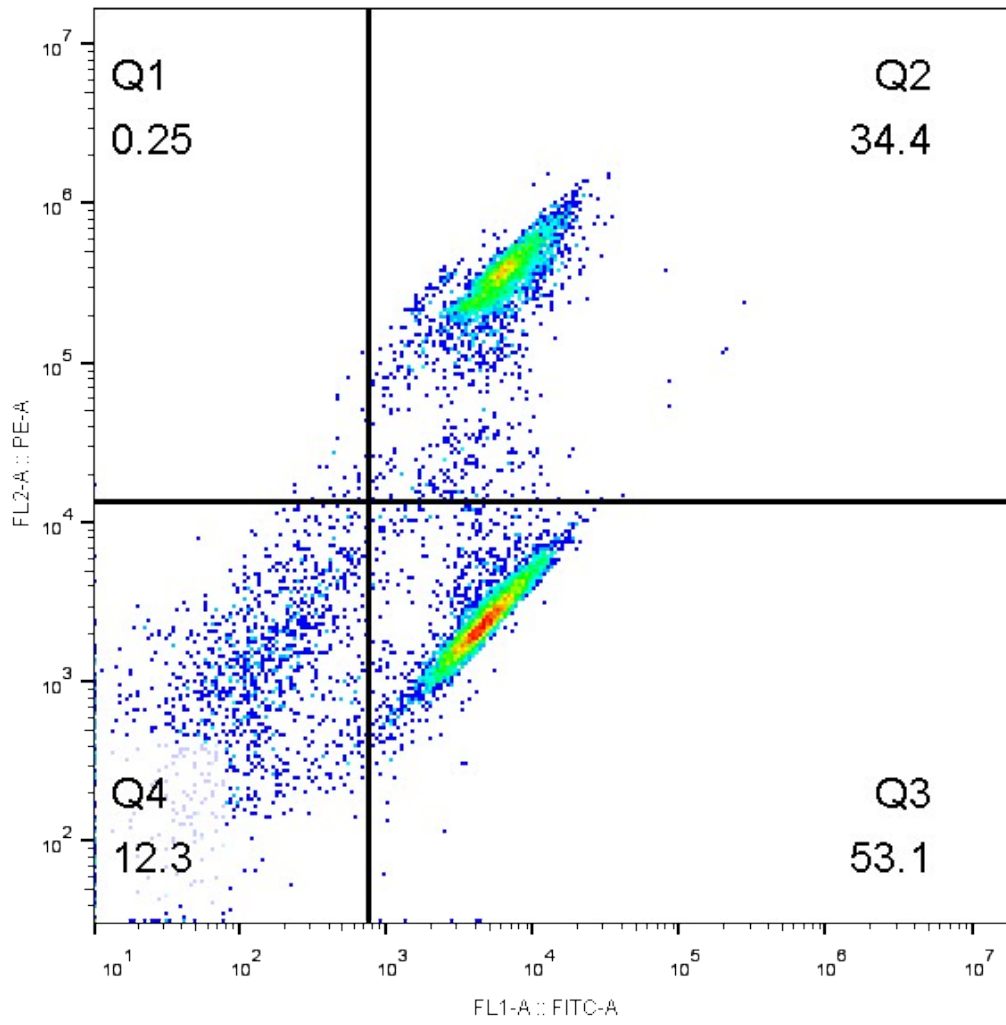

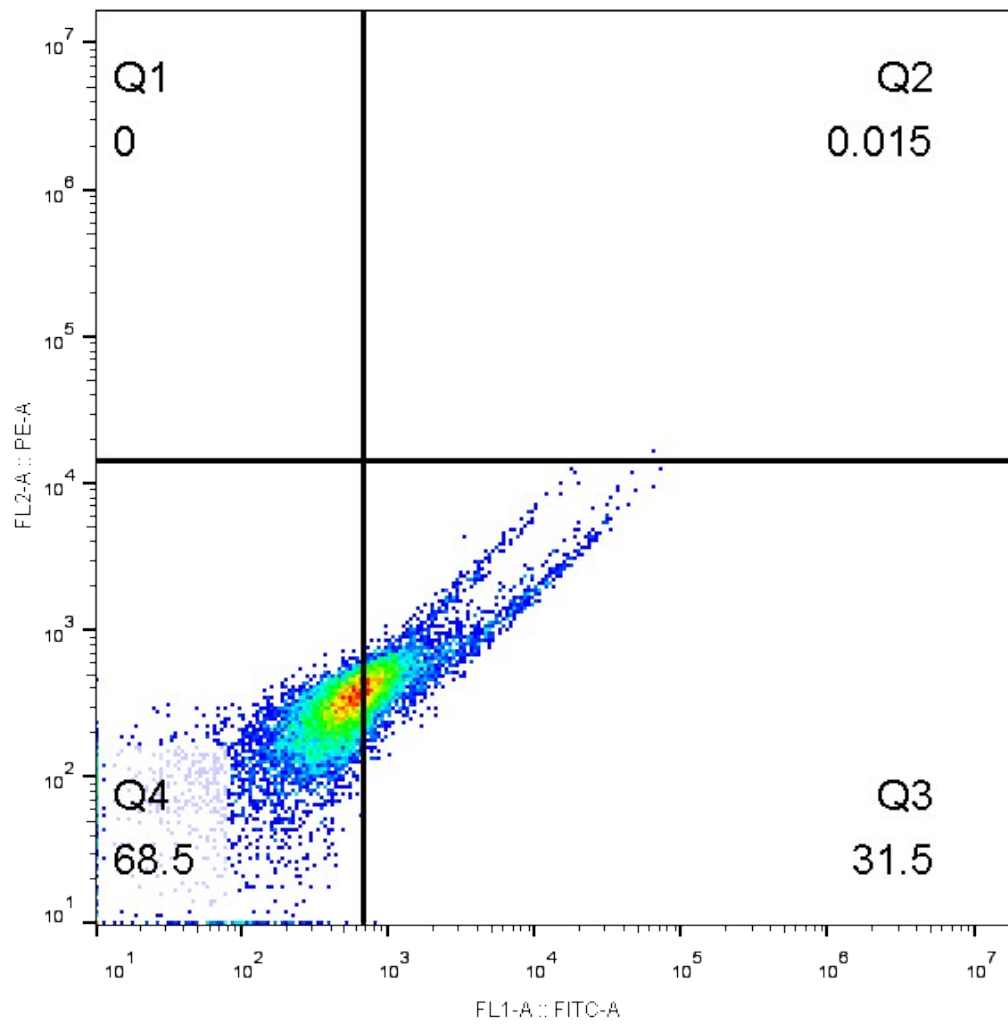

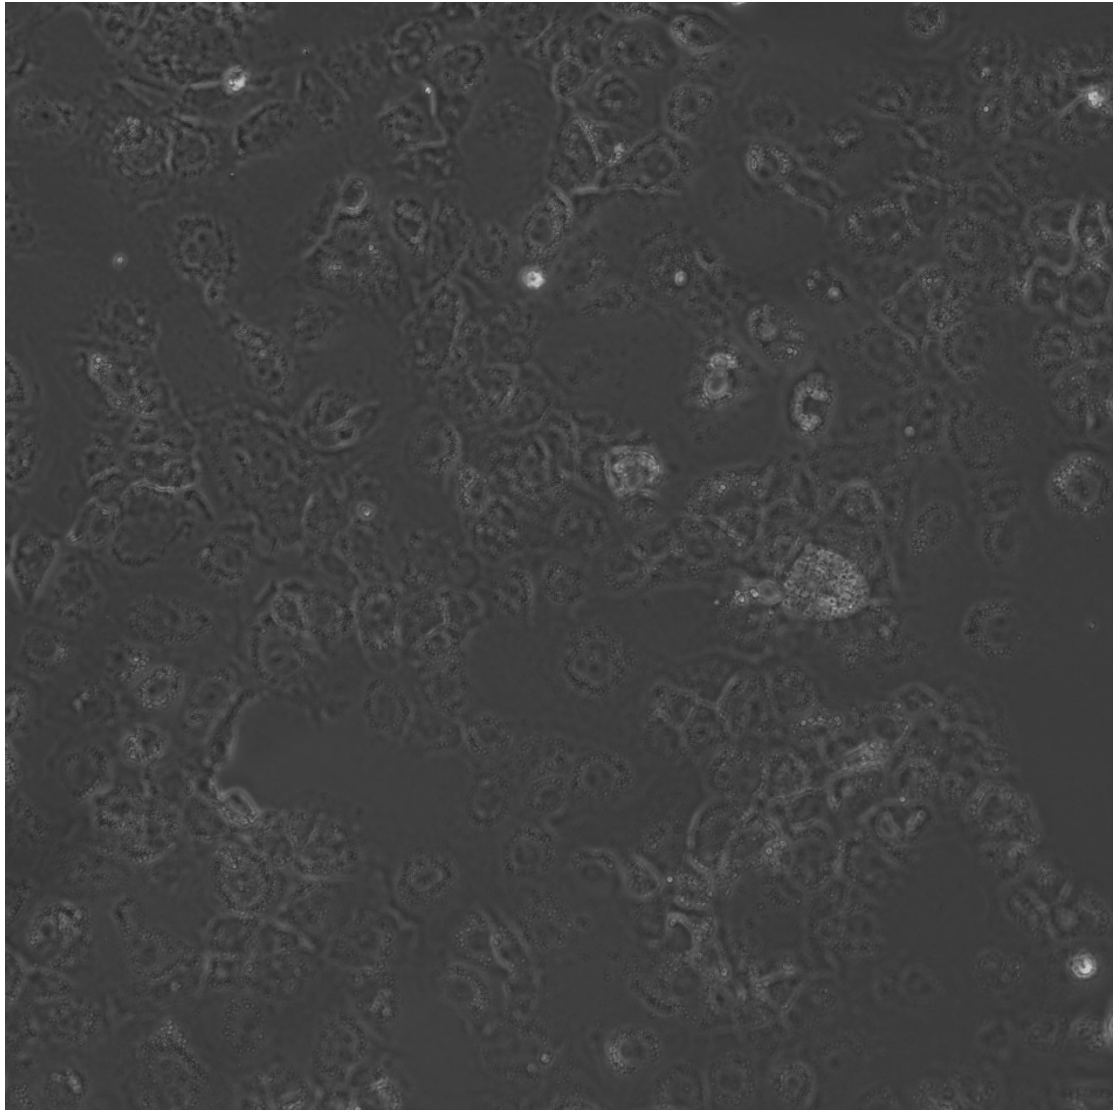



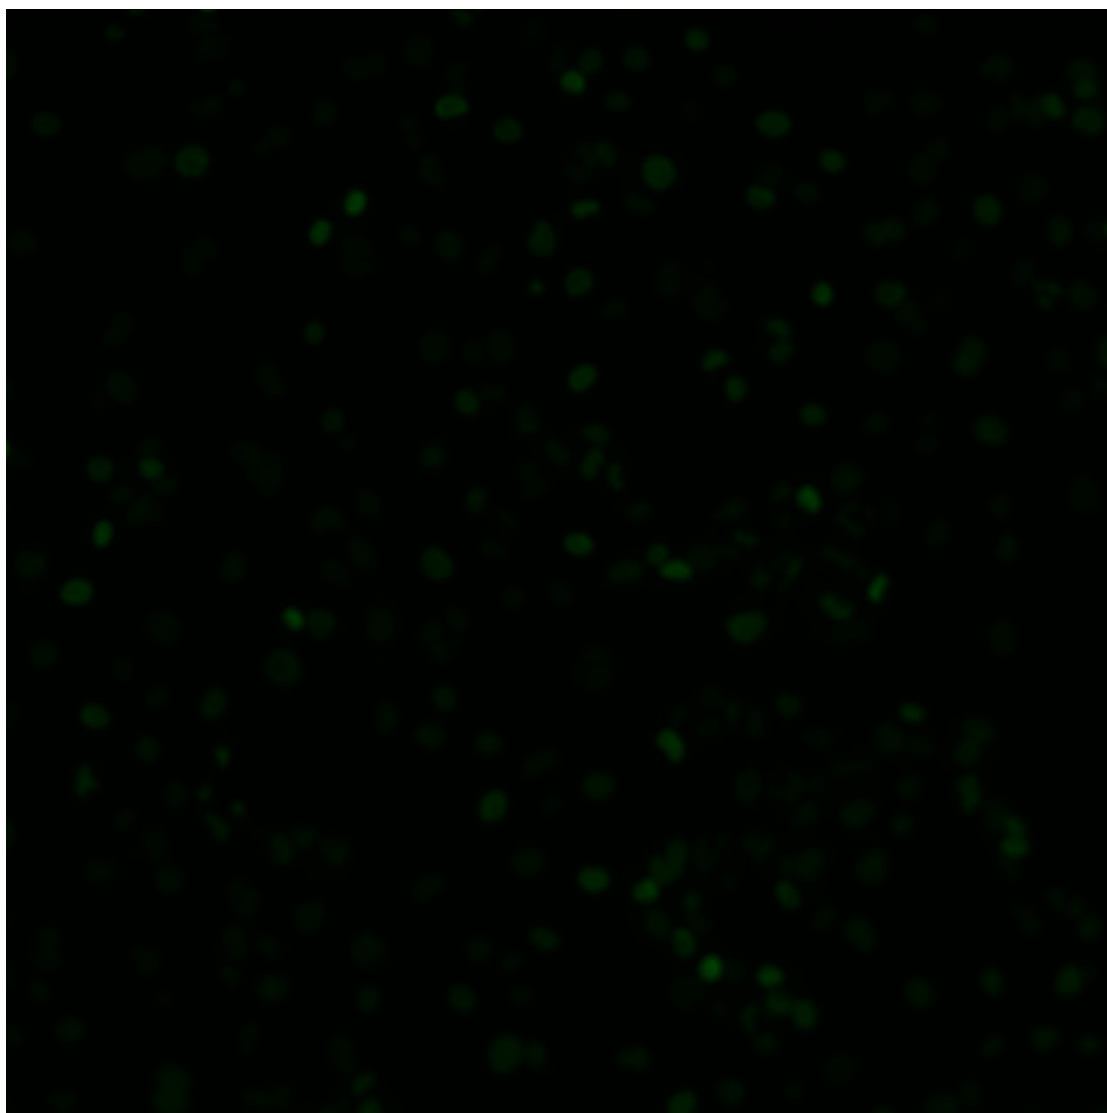

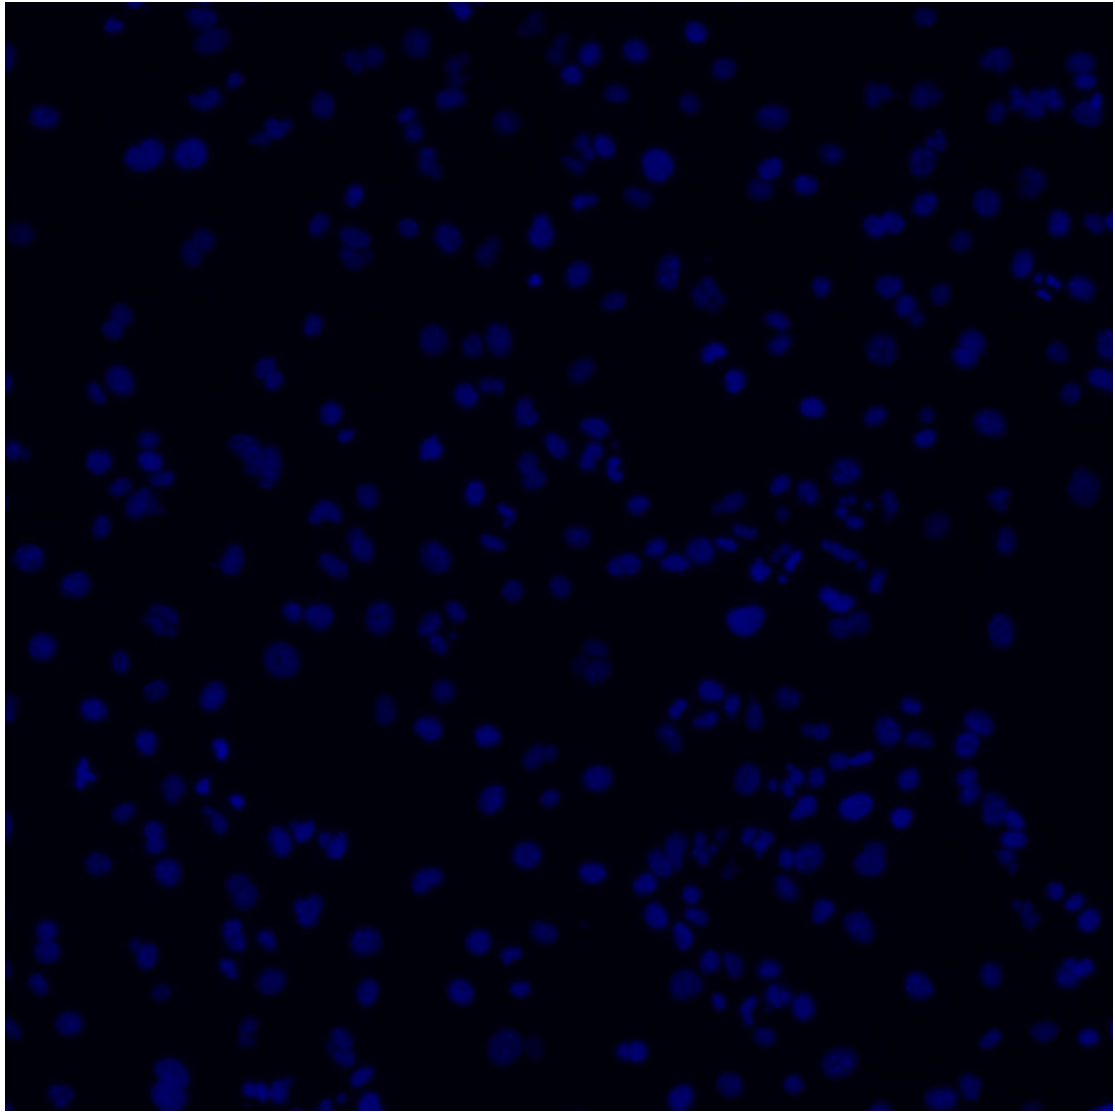

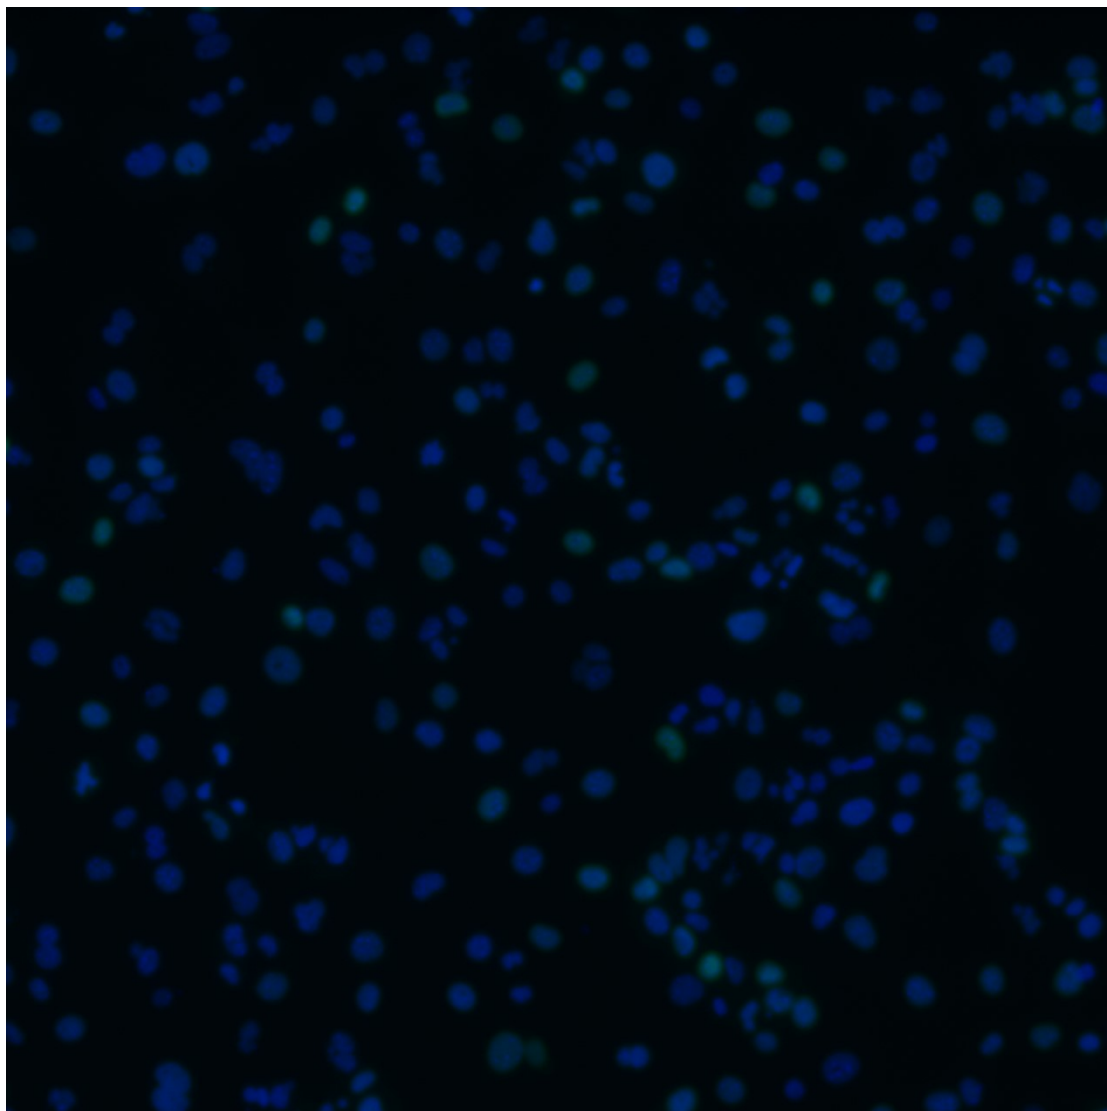

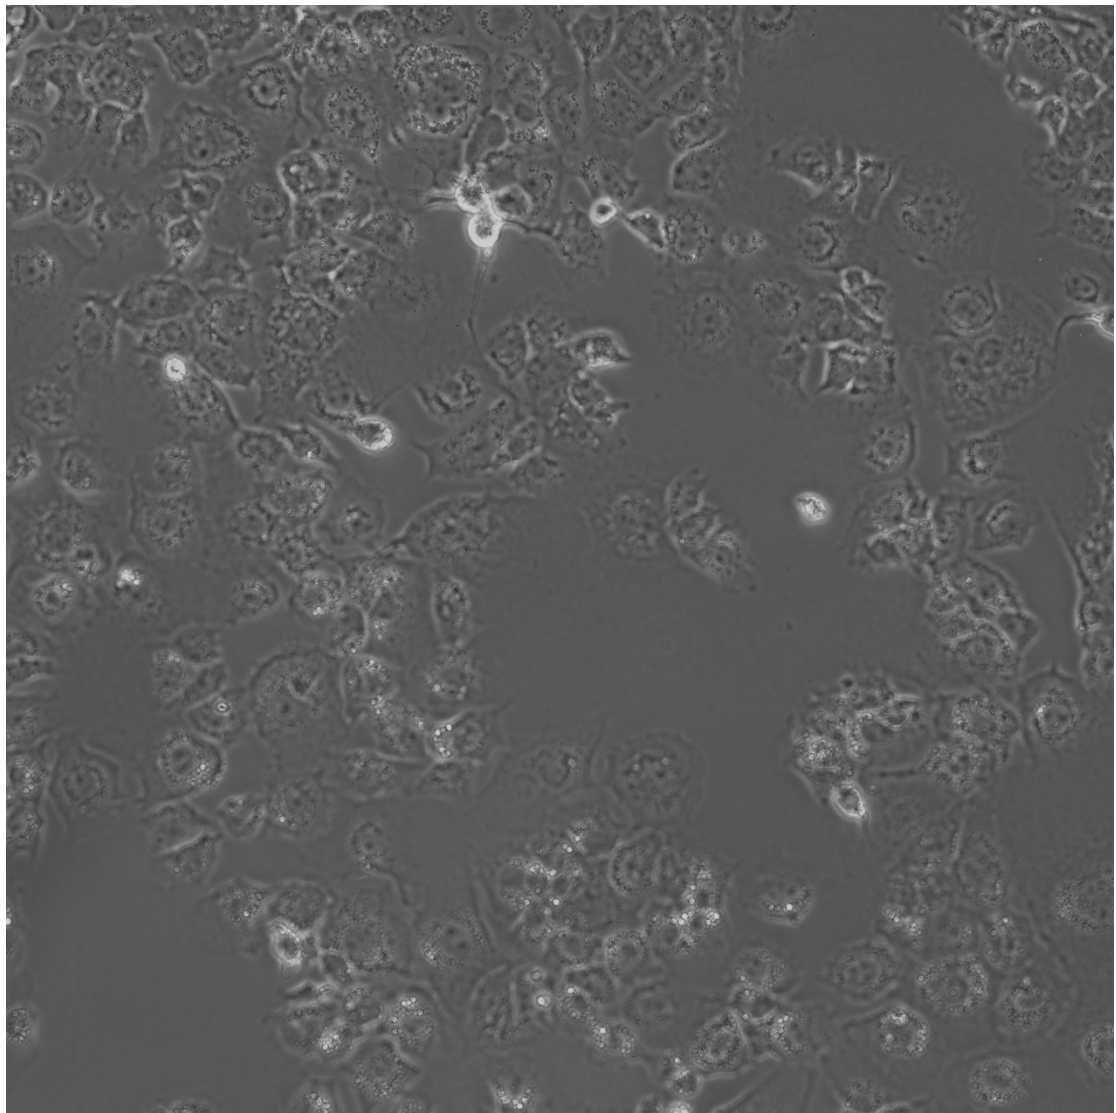

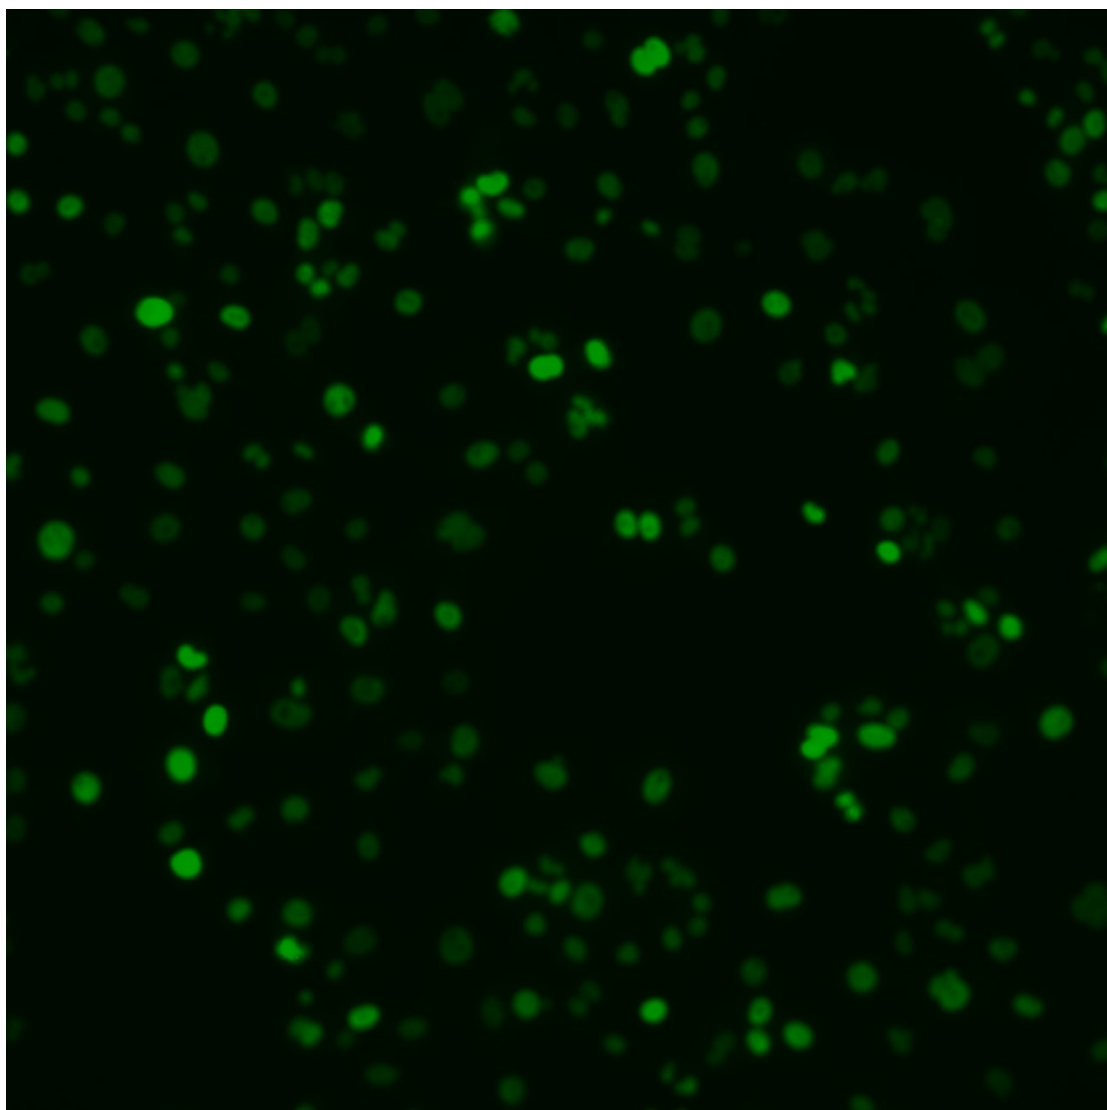



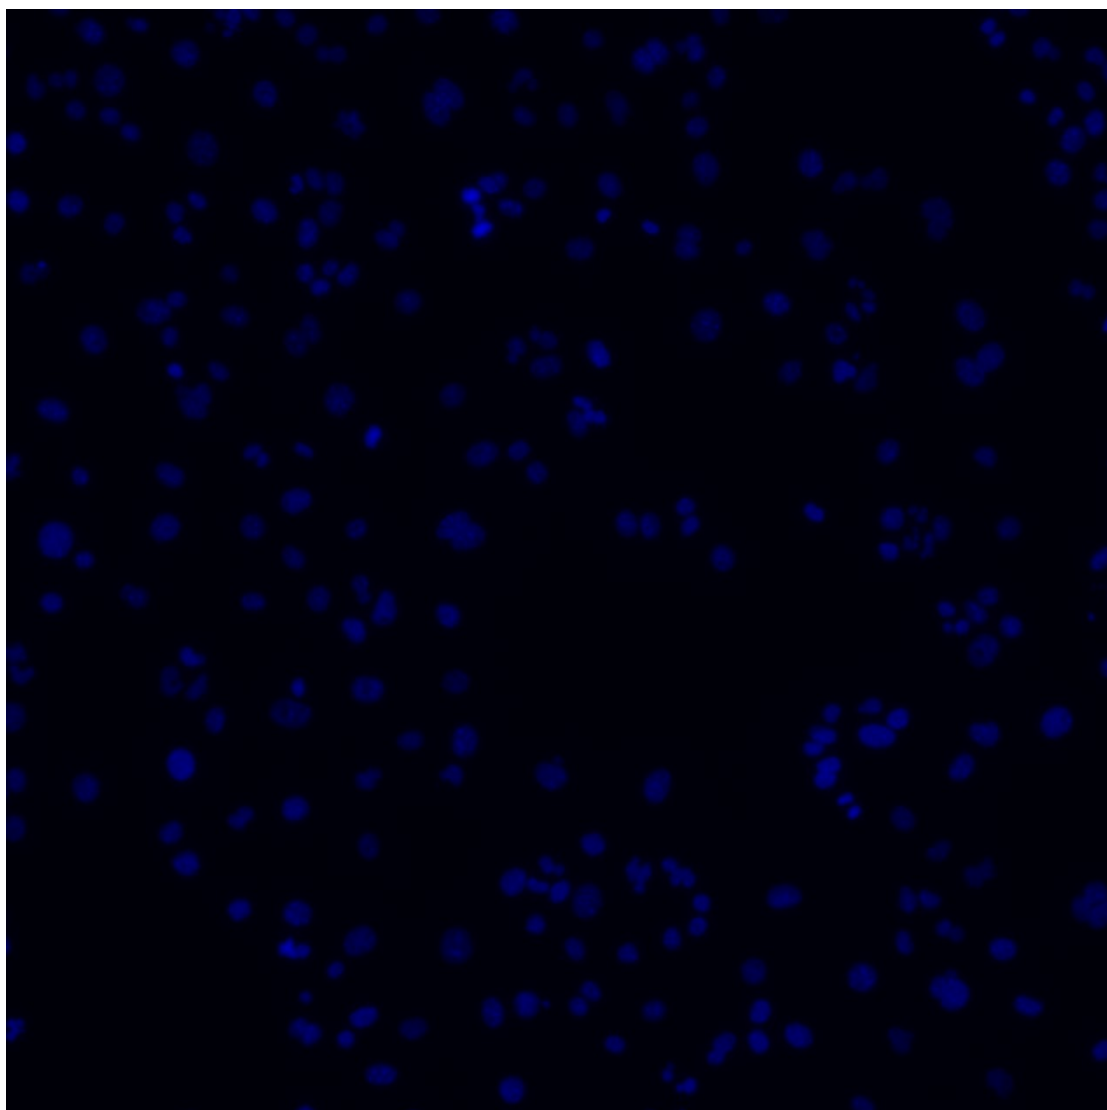

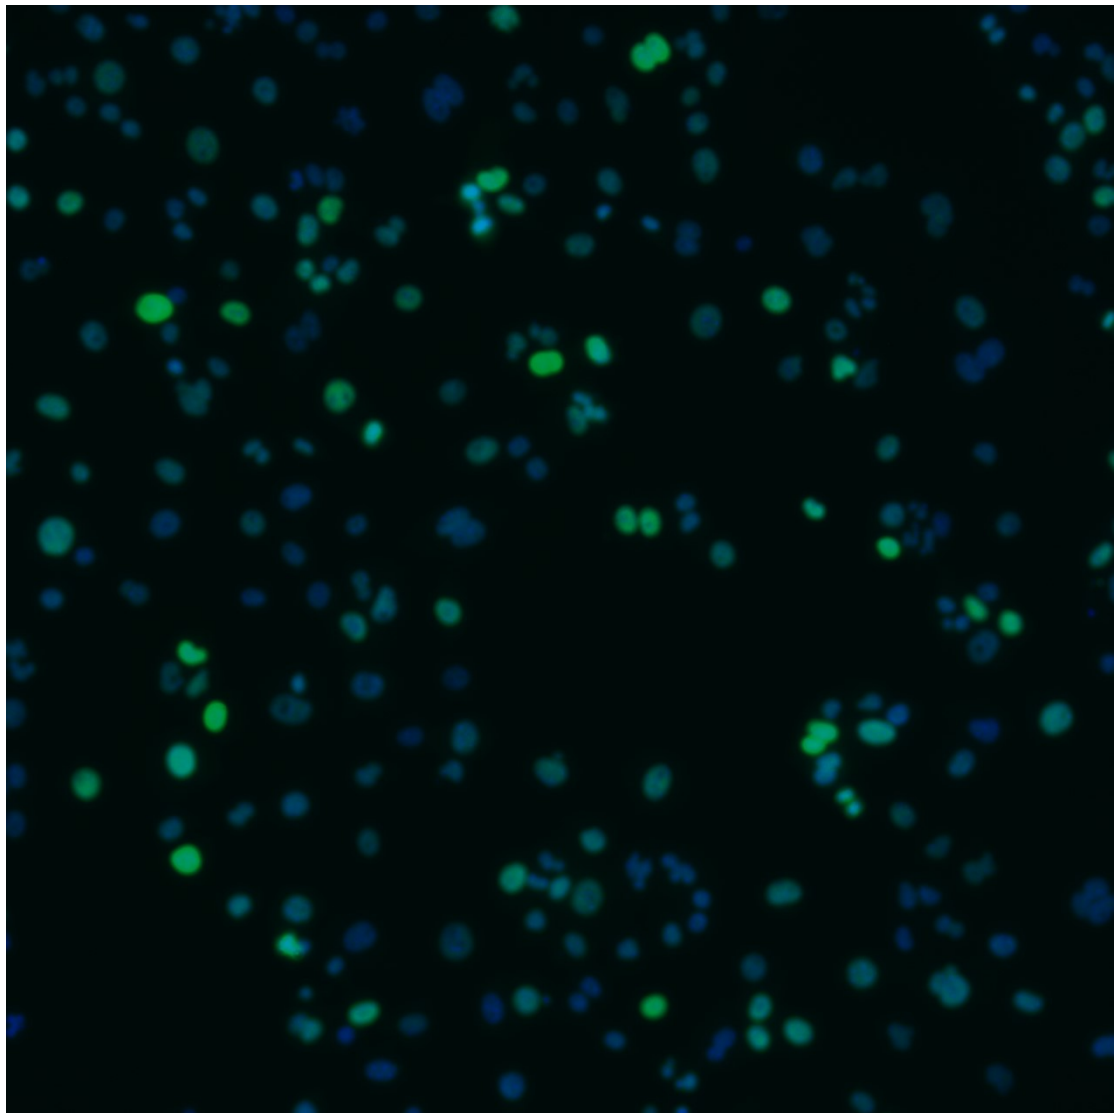

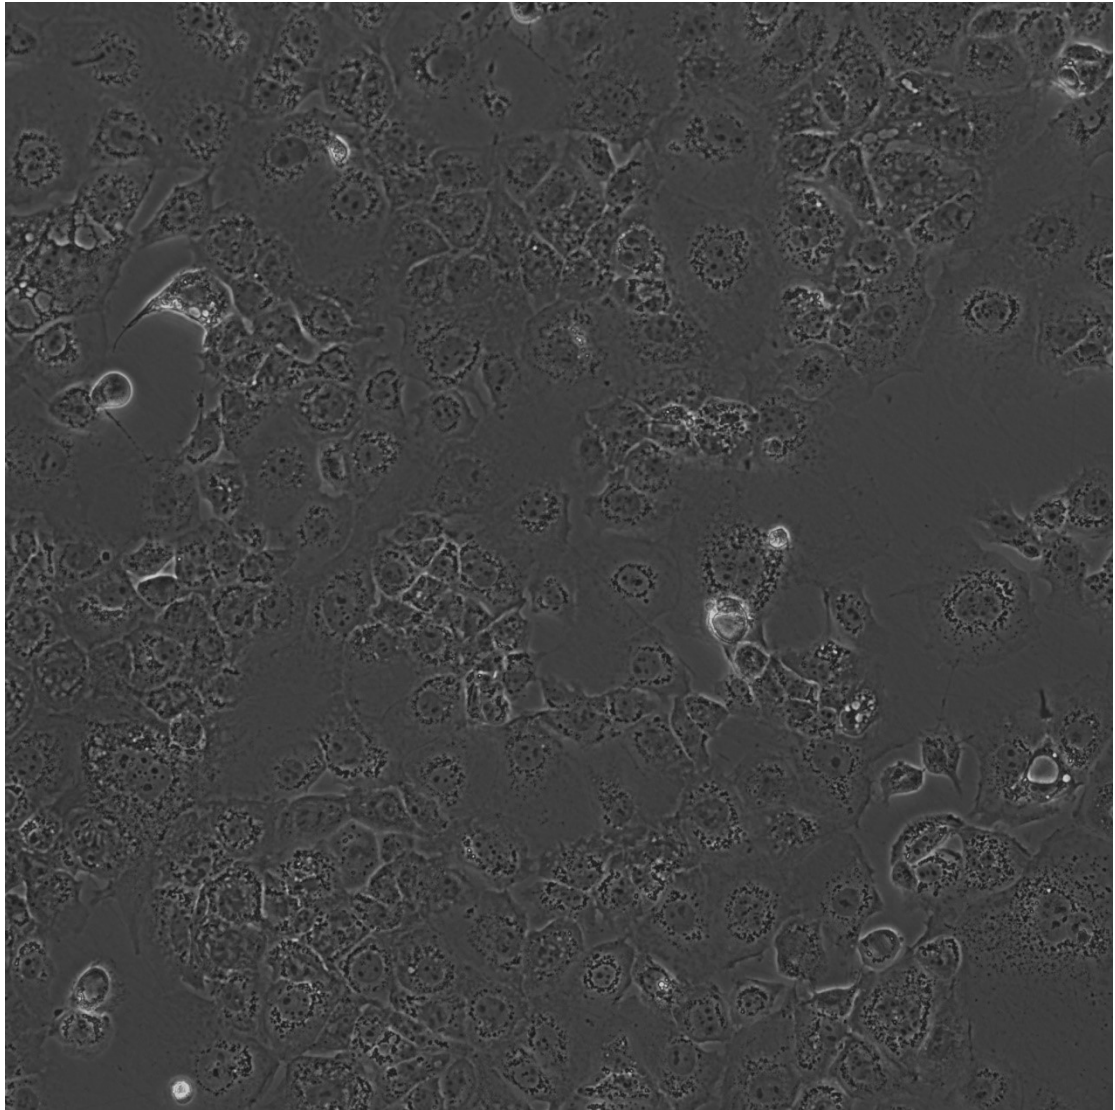

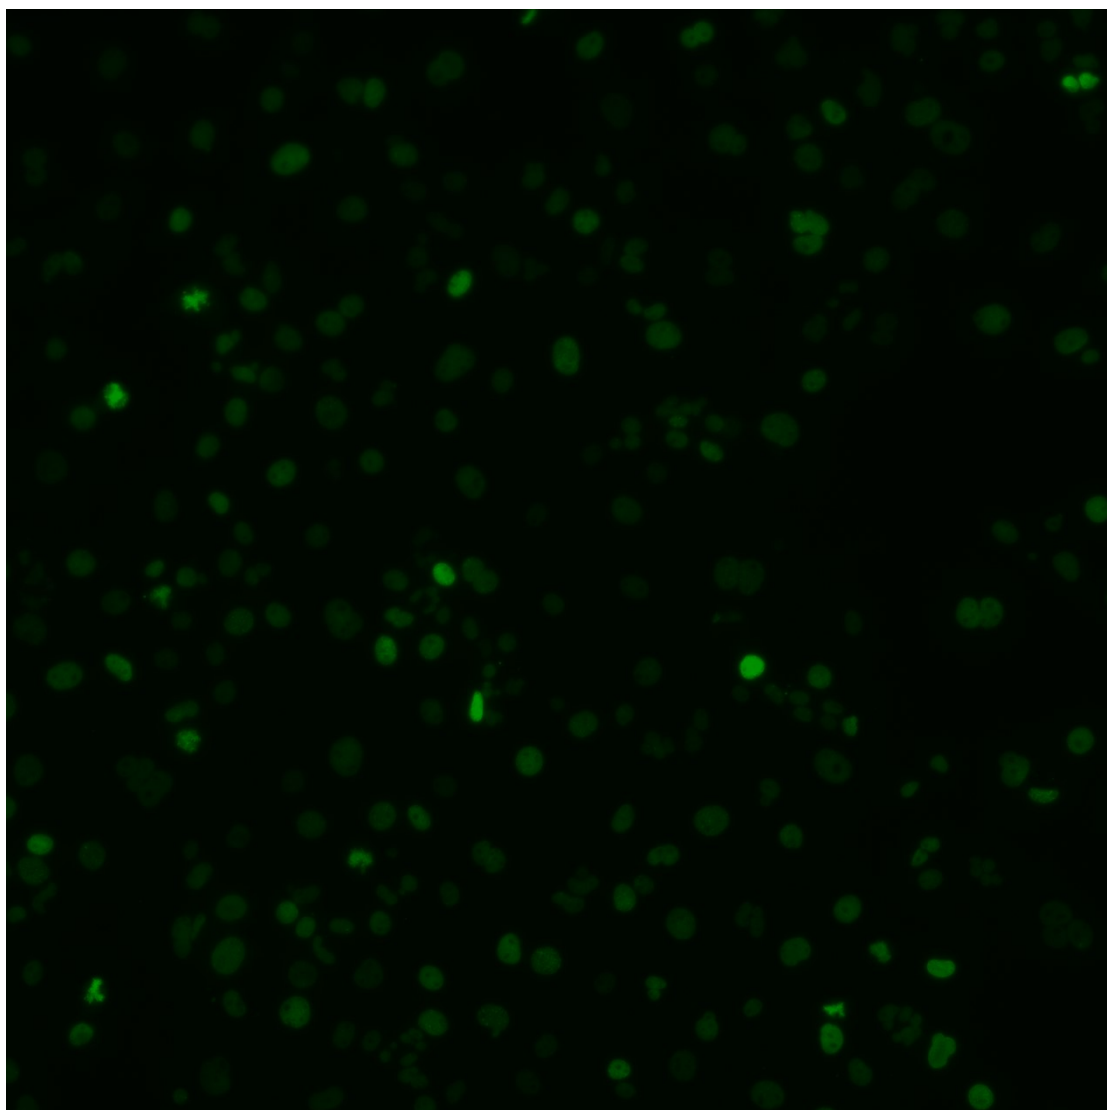

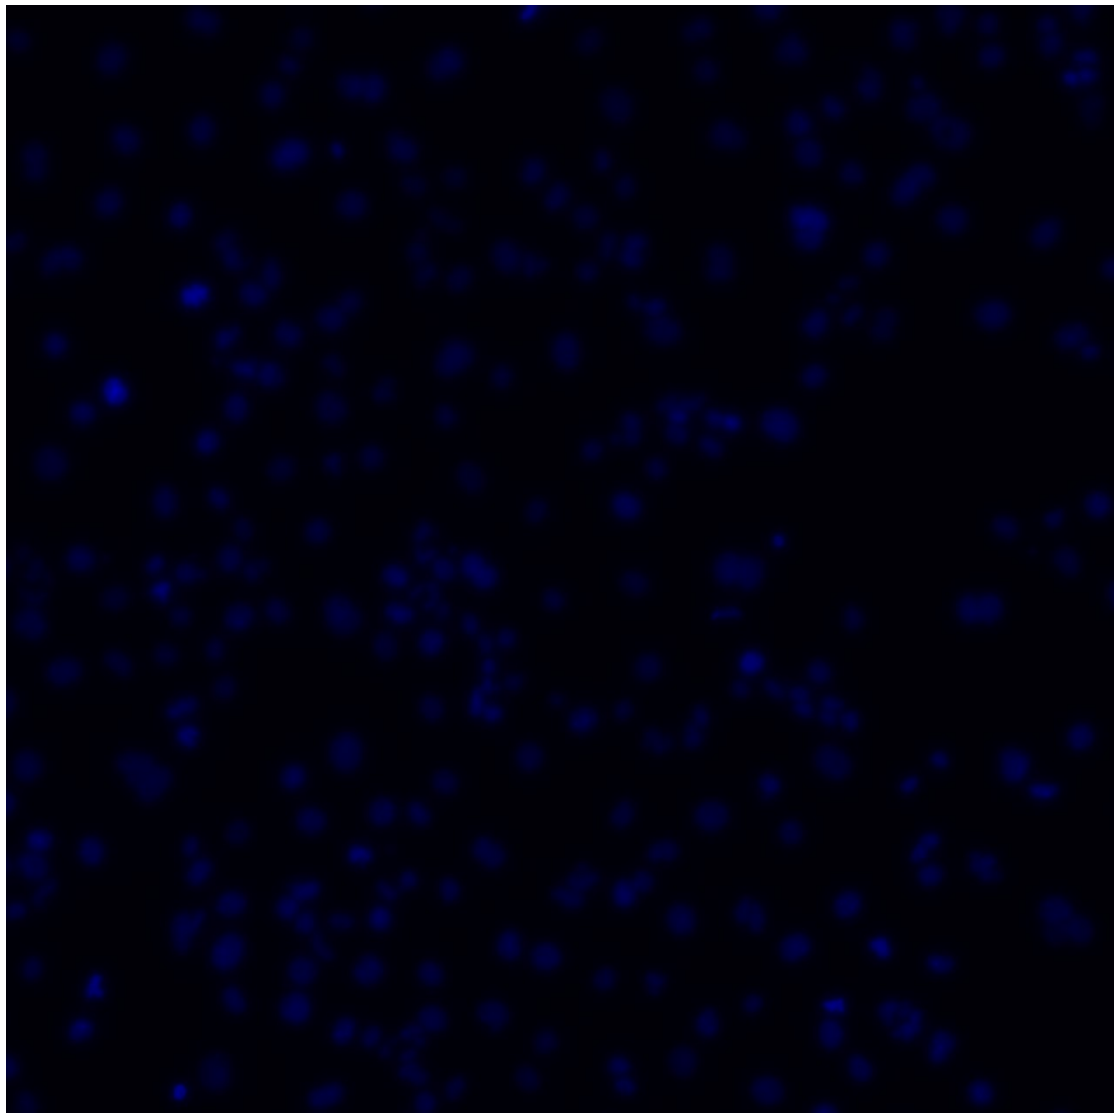



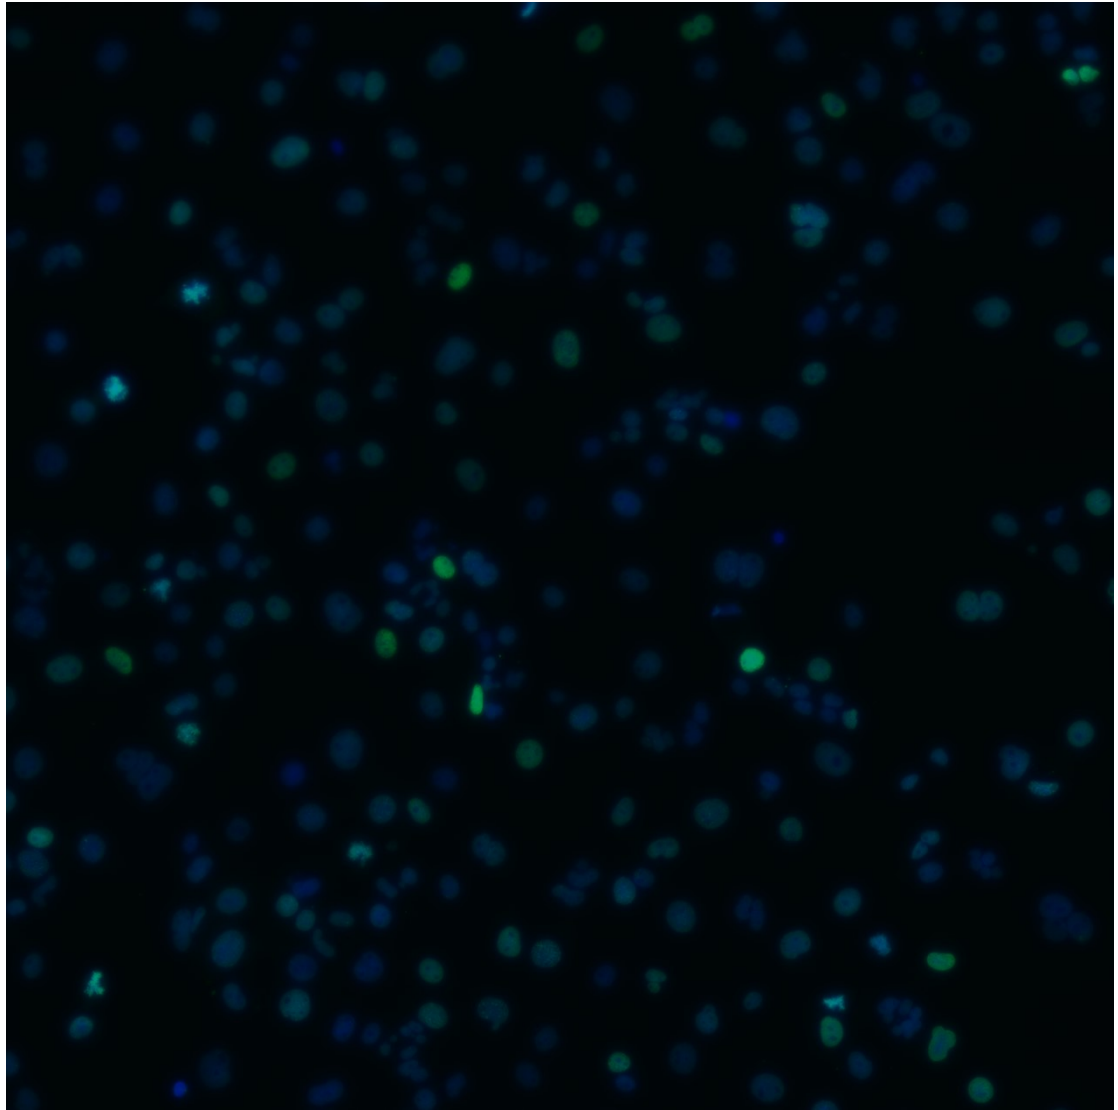

Supplement: d2fo03847a1.pdf [file d2fo03847a1.pdf]
