# Supplementary material for: Identification of antioxidant peptides after digestion and absorption of isinglass by serum peptidomics and cellular antioxidant activity analysis
Source: Royal Society of Chemistry journal article supplement (doi:10.1039/d2fo03847a), 2023-01-01
Supplement: d2fo03847a2.pdf [file d2fo03847a2.pdf]

1 **Supplementary Figure Captions**

2 **Figure.S1.** Protein/peptide statistics. (A) Protein polypeptide identification number  
3 distribution; (B) Protein sequence coverage distribution; (C) Polypeptide length  
4 distribution; (D) Polypeptide charge number distribution.

5 **Figure.S2.** Effect of synthetic peptides on cell activity.

6 **Figure.S3.** Effects of H<sub>2</sub>O<sub>2</sub> at different time and concentration on AML12 cells.

7 **Figure.S4.** Effects of H<sub>2</sub>O<sub>2</sub> on SOD, CAT and MDA, apoptosis, reactive oxygen  
8 species and DNA damage in AML12 cells. (A) The contents of SOD, CAT, MDA and  
9 ROS level in cells; (B) Apoptosis rate of cells; (C) Cell DNA damage.

10

11 **Supplementary Figure**

12 **Fig.S1**

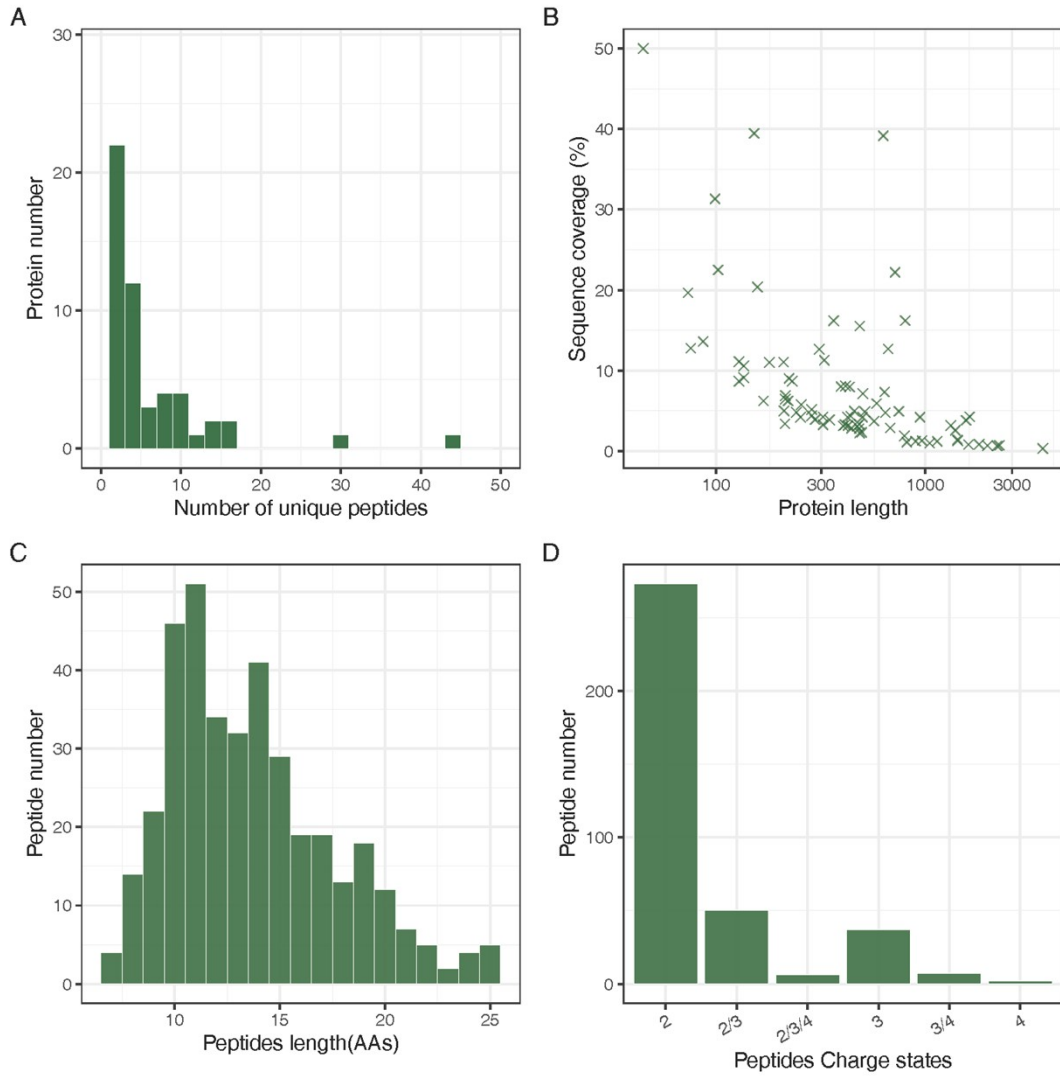

13

14 **Fig.S2**

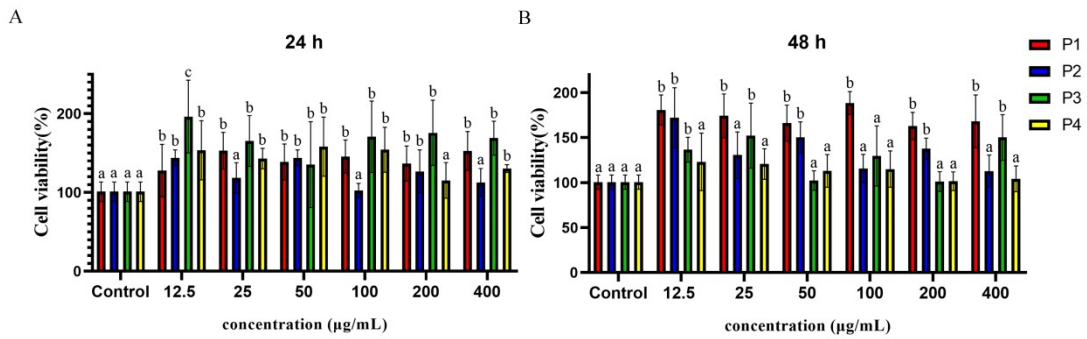

15

16

17 Fig.S3

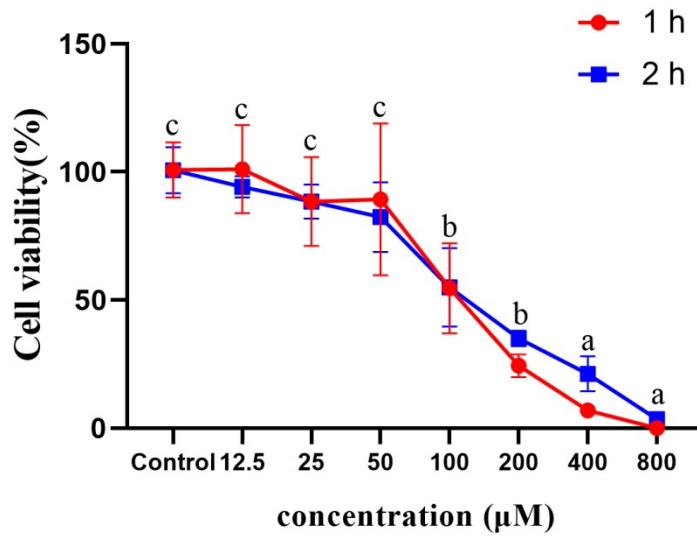

18

19 Fig.S4

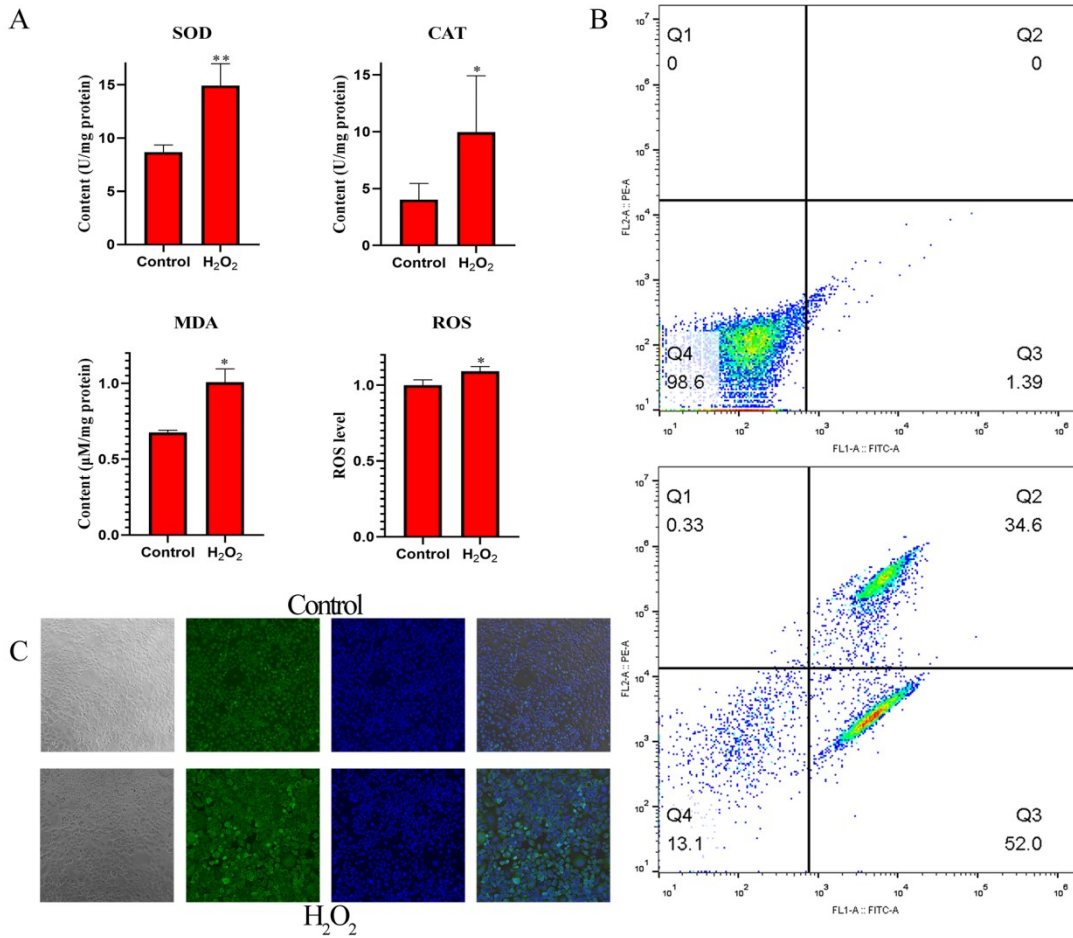

20

21
