# Supplementary material for: Identification of antioxidant peptides after digestion and absorption of isinglass by serum peptidomics and cellular antioxidant activity analysis
Source: Royal Society of Chemistry journal article supplement (doi:10.1039/d2fo03847a), 2023-01-01
Supplement: d2fo03847a3.pdf [file d2fo03847a3.pdf]

## 1 Table S1

### 2 Total peptides

| No. | Sequence             | Mass    | <i>P</i> -Value | GRAVY | Fold Change | Protein origin |
|-----|----------------------|---------|-----------------|-------|-------------|----------------|
| 1   | AAEEPQQKQEPLG        | 1552.63 | 0.940237217     | -1.76 | 0.935212323 | Otub1          |
| 2   | AAEVDLPTTEELQGLVPR   | 1837.02 | 0.355710948     | -0.17 | 1.96930503  | F13a1          |
| 3   | AALPADPPASVVVGPVVVPR | 1911.24 | 0.945250123     | 0.95  | 0.96102063  | Ahsg           |
| 4   | AAPRPPPAISVSVS       | 1348.54 | 0.225964922     | 0.36  | 2.047731285 | Zyx            |
| 5   | AAPRPPPAISVSVSAPAF   | 1734.98 | 0.829148994     | 0.54  | 1.169803418 | Zyx            |
| 6   | AATELRGVV            | 915.04  | 0.024155158     | 0.74  | 1.414682434 | Osbp           |
| 7   | AAVPELLEQQEEDRSKL    | 1955.11 | 0.259152226     | -0.95 | 2.069120145 | Snx5           |
| 8   | ADDDYDEPTDSL         | 1470.35 | 0.873845078     | -1.79 | 1.091976679 | Fgb            |
| 9   | ADDDYDEPTDSLDA       | 1541.42 | 0.511804292     | -1.54 | 0.694261485 | Fgb            |
| 10  | ADDDYDEPTDSLDA       | 1697.61 | 0.191401205     | -1.73 | 1.828589326 | Fgb            |
| 11  | ADEAGSEAHREGET       | 1458.39 | 0.116036429     | -1.58 | 1.775813813 | Fga            |
| 12  | ADEAGSEAHREGETRNT    | 1829.78 | 0.038844255     | -1.81 | 0.273751904 | Fga            |
| 13  | ADEAGSEAHREGETRNTKRG | 2171.19 | 0.422649731     | -1.98 | 0.264793532 | Fga            |
| 14  | ADLPSLAADFVESK       | 1462.59 | 0.422649731     | 0.17  | 0.40497331  | ALB            |
| 15  | ADMQNLVERL           | 1188.35 | 0.101519561     | -0.3  | 2.293802179 | Cap1           |
| 16  | ADMQNLVERLE          | 1317.46 | 0.055934498     | -0.59 | 2.545790502 | Cap1           |
| 17  | ADPPASVVVGPVVVPR     | 1558.81 | 0.509041627     | 0.83  | 0.477854154 | Ahsg           |
| 18  | AEAVKPR              | 769.89  | 0.207009951     | -0.81 | 0.292378001 | Epg5           |
| 19  | AEEGIAAGGVMDVN       | 1332.43 | 0.640960794     | 0.36  | 1.214961376 | Rps12          |
| 20  | AEEVEEERL            | 1103.13 | 0.422649731     | -1.36 | 2.269826085 | SRPP           |
| 21  | AEEVEEERLK           | 1231.3  | 0.273441597     | -1.61 | 2.290159494 | SRPP           |
| 22  | AEEVEEERLKY          | 1394.47 | 0.540984966     | -1.58 | 1.84317279  | SRPP           |
| 23  | AEEVEEERLKYLD        | 1622.72 | 0.422649731     | -1.32 | 1.760902892 | SRPP           |
| 24  | AELDPPFGAPAGAPGGP    | 1423.52 | 0.422649731     | -0.08 | 1.78757845  | Clta           |
| 25  | AEQEPTAEQLAQIA       | 1498.58 | 0.630881512     | -0.56 | 1.296045477 | Arhgdia        |
| 26  | AESSAATQSPS          | 1035.01 | 0.667600759     | -0.65 | 1.445375195 | Rtn3           |

|    |                                |         |             |       |             |          |
|----|--------------------------------|---------|-------------|-------|-------------|----------|
| 27 | AESSAATQSPSVS                  | 1221.22 | 0.845592399 | -0.28 | 0.900554478 | Rtn3     |
| 28 | AETEERSLDNF                    | 1310.31 | 0.692316781 | -1.37 | 0.785865912 | Cdv3     |
| 29 | AEVDLPTEELQGLVPR               | 1765.95 | 0.240473406 | -0.29 | 2.970645716 | F13a1    |
| 30 | AFLEVNEEGSEAAASTAVVIAGR        | 2291.46 | 0.509417391 | 0.41  | 0.592615431 | SERPINC1 |
| 31 | AGSVADSDAVVKL                  | 1231.34 | 0.422649731 | 0.68  | 0.596073878 | LgalsI   |
| 32 | AGSVADSDAVVKLDDGHLN            | 1882.97 | 0.372875734 | -0.07 | 0.732965378 | LgalsI   |
| 33 | AGYKGRVT                       | 850.96  | 0.130305588 | -0.65 | 2.331397116 | F2       |
| 34 | AHREGETRNT                     | 1170.19 | 0.422649731 | -2.27 | 0.026234178 | Fga      |
| 35 | AIAANEADAVTL DAGLVYDAY         | 2126.26 | 0.362965862 | 0.57  | 0.424688401 | TF       |
| 36 | AIAANEADAVTL DAGLVYDAYLA<br>PN | 2521.71 | 0.408322398 | 0.5   | 0.344893828 | TF       |
| 37 | AIQVYYNPDQPPKP                 | 1629.8  | 0.38823697  | -1.17 | 2.676854924 | Fgg      |
| 38 | AIQVYYNPDQPPKPGM               | 1818.05 | 0.200661809 | -0.93 | 2.403714448 | Fgg      |
| 39 | AIQVYYNPDQPPKPGMIDSATQ         | 2433.68 | 0.026910242 | -0.78 | 4.522386976 | Fgg      |
| 40 | ALAVAASGPGSS                   | 987.06  | 0.815294761 | 0.87  | 1.123341157 | Pzp      |
| 41 | ALAVAASGPGSSF                  | 1134.23 | 0.069637291 | 1.02  | 13.63010667 | Pzp      |
| 42 | ALAVAASGPGSSFR                 | 1290.42 | 0.135911074 | 0.62  | 5.97069204  | Pzp      |
| 43 | ALGLDEGEPAGSWDLTVEG            | 1915.99 | 0.290290242 | -0.21 | 1.824677153 | Cpn2     |
| 44 | ALGLDEGEPAGSWDLTVEGR           | 2072.18 | 0.609421933 | -0.42 | 1.636665009 | Cpn2     |
| 45 | ALPADPPASVVVGPVVVPR            | 1840.16 | 0.869177917 | 0.91  | 1.113339709 | Ahsg     |
| 46 | ANALAHKYH                      | 1024.13 | 0.422649731 | -0.66 | 0.574305412 | HBB      |
| 47 | ANELKATIDQNLEDL                | 1686.8  | 0.671117883 | -0.64 | 0.74343981  | Apoa4    |
| 48 | APELLFAK                       | 1035.23 | 0.365686132 | 0.87  | 0.561548673 | ALB      |
| 49 | AQQAADKYLYVD                   | 1384.48 | 0.545070419 | -0.59 | 1.421828303 | Myh9     |
| 50 | AQQAADKYLYVDKNF                | 1773.93 | 0.171631484 | -0.78 | 3.04540419  | Myh9     |
| 51 | ASAGLLGAHAAAITAYALTLTK         | 2085.39 | 0.422649731 | 1     | 0.58140637  | C4b      |
| 52 | ASGVAVSDGVIK                   | 1102.23 | 0.422649731 | 0.91  | 0.595134781 | Cfl1     |
| 53 | ASVSTVLTSKYR                   | 1311.48 | 0.422649731 | 0.04  | 0.185136237 | Hba      |
| 54 | ASVVVGPVVVPR                   | 1178.42 | 0.371969063 | 1.51  | 1.483757519 | Ahsg     |

|    |                               |         |             |       |             |        |
|----|-------------------------------|---------|-------------|-------|-------------|--------|
| 55 | ATDELASKL                     | 947.03  | 0.336906938 | -0.13 | 1.820016853 | Efh2   |
| 56 | ATDELASKLS                    | 1034.11 | 0.992044694 | -0.2  | 0.995029467 | Efh2   |
| 57 | AVAASGPGSSFR                  | 1106.18 | 0.403437926 | 0.26  | 0.86980259  | Pzp    |
| 58 | AVFVDLEPTVIDEV                | 1545.72 | 0.97992784  | 0.96  | 0.978262029 | Tuba1b |
| 59 | AVMDDFAAFVEK                  | 1342.51 | 0.29966917  | 0.58  | 0.32120133  | ALB    |
| 60 | AVPPNNSNAAEVDLPTEELQGLVP<br>R | 2630.84 | 0.335473997 | -0.46 | 3.14326596  | F13a1  |
| 61 | DDDIAALVVDNG                  | 1216.24 | 0.783989624 | 0.2   | 1.149938375 | Actb   |
| 62 | DDDYDEPTDSLDA                 | 1470.35 | 0.991122042 | -1.79 | 0.991761019 | Fgb    |
| 63 | DDPNLPR                       | 939.96  | 0.376137356 | -2.24 | 0.226643315 | ALB    |
| 64 | DDPSVPLQPVTPLQ                | 1505.66 | 0.906941897 | -0.42 | 1.081235703 | C4b    |
| 65 | DDPSVPLQPVTPLQL               | 1618.82 | 0.807019459 | -0.14 | 1.181866129 | C4b    |
| 66 | DDPSVPLQPVTPLQLFEG            | 1952.15 | 0.094302948 | -0.18 | 3.138226542 | C4b    |
| 67 | DDPSVPLQPVTPLQLFEGR           | 2108.34 | 0.425773007 | -0.41 | 1.782930855 | C4b    |
| 68 | DDPSVPLQPVTPLQLFEGRRS         | 2351.6  | 0.379295486 | -0.62 | 0.251433069 | C4b    |
| 69 | DEAGSEAHREGET                 | 1387.31 | 0.610641045 | -1.84 | 1.350106038 | Fga    |
| 70 | DEAGSEAHREGETR                | 1543.5  | 0.422649731 | -2.03 | 0.135425085 | Fga    |
| 71 | DEAGSEAHREGETRNT              | 1758.7  | 0.780823838 | -2.04 | 0.661172574 | Fga    |
| 72 | DEAGSEAHREGETRNTK             | 1886.87 | 0.422649731 | -2.15 | 0.108869544 | Fga    |
| 73 | DEAGSEAHREGETRNTKRG           | 2100.11 | 0.188791949 | -2.18 | 0.006281138 | Fga    |
| 74 | DEFKPLVEEPQNLIK               | 1799.02 | 0.422649731 | -0.86 | 0.629025299 | ALB    |
| 75 | DGAGDVAFVK                    | 978.05  | 0.273383846 | 0.31  | 0.355460732 | TF     |
| 76 | DIFTGLIGPMK                   | 1191.43 | 0.527238921 | 0.64  | 0.631441624 | Cp     |
| 77 | DKGEFLSEGGV                   | 1194.24 | 0.545394898 | -0.5  | 1.19616987  | Fga    |
| 78 | DKGEFLSEGGVR                  | 1350.43 | 0.667494794 | -0.81 | 1.260211513 | Fga    |
| 79 | DLEDELEPDPR                   | 1327.34 | 0.2969219   | -1.92 | 0.519759658 | Proc   |
| 80 | DLPSLAADFVESK                 | 1391.51 | 0.422649731 | 0.05  | 0.410861998 | ALB    |
| 81 | DLPTEELQGLVPR                 | 1466.63 | 0.122934384 | -0.55 | 3.823181851 | F13a1  |
| 82 | DLSGTLESIPDK                  | 1274.37 | 0.923700485 | -0.55 | 1.048463537 | Apoc1  |

|     |                    |         |             |       |             |           |
|-----|--------------------|---------|-------------|-------|-------------|-----------|
| 83  | DNQDFGDHATL        | 1232.2  | 0.565203434 | -1.22 | 0.695375754 | Serpinf2  |
| 84  | DPGLRGNIL          | 954.08  | 0.184182753 | -0.2  | 3.848445771 | Gnptg     |
| 85  | DPNYRPPGLPA        | 1359.48 | 0.422649731 | -1.28 | 0.591301338 | Saa2      |
| 86  | DPPASVVVGPVVVP     | 1331.55 | 0.164796665 | 1.14  | 1.880295473 | Ahsg      |
| 87  | DPPASVVVGPVVVPR    | 1487.73 | 0.102193061 | 0.76  | 1.577534723 | Ahsg      |
| 88  | DSELQLSTGNGLFVNND  | 1822.87 | 0.238062019 | -0.57 | 2.815604824 | Serpina1a |
| 89  | DTDLEDELEPDPR      | 1543.53 | 0.470340333 | -1.95 | 1.246901766 | Proc      |
| 90  | DTEDKGEFLSEGGGV    | 1539.54 | 0.639196333 | -0.91 | 0.847699863 | Fga       |
| 91  | DTEDKGEFLSEGGGVR   | 1695.73 | 0.128489242 | -1.14 | 4.256572662 | Fga       |
| 92  | DTTEKELLSYIDG      | 1598.65 | 0.241424447 | -0.94 | 1.698989425 | F2        |
| 93  | DVFLGMFLYEYAR      | 1623.86 | 0.302372787 | 0.51  | 0.18647653  | ALB       |
| 94  | DVQETDTSQK         | 1150.14 | 0.356295455 | -1.94 | 1.267088215 | Serpina1a |
| 95  | DYDEPTDSLDA        | 1240.17 | 0.695344122 | -1.48 | 0.68803529  | Fgb       |
| 96  | DYDEPTDSLDA        | 1396.36 | 0.218449713 | -1.73 | 2.687008485 | Fgb       |
| 97  | DYSVLLLR           | 1077.27 | 0.23207397  | 1.08  | 0.405502888 | ALB       |
| 98  | EAGSEAHREGETRNT    | 1643.62 | 0.422649731 | -1.94 | 0.330234262 | Fga       |
| 99  | EDELEPDPR          | 1099.1  | 0.793307694 | -2.38 | 0.757153119 | Proc      |
| 100 | EDKGEFLSEGGGV      | 1323.35 | 0.542670982 | -0.73 | 0.920212363 | Fga       |
| 101 | EDKGEFLSEGGGVR     | 1479.54 | 0.742473705 | -1    | 1.133395409 | Fga       |
| 102 | EDPQTFYYAVAVVK     | 1629.8  | 0.417459447 | -0.02 | 0.489986983 | TF        |
| 103 | EDVQETDTSQK        | 1279.25 | 0.67106891  | -2.08 | 0.850960427 | Serpina1a |
| 104 | EDVQETDTSQKDQ      | 1522.47 | 0.422649731 | -2.3  | 0.630443929 | Serpina1a |
| 105 | EDVQETDTSQKDQSPA   | 1777.74 | 0.422649731 | -1.91 | 0.541486648 | Serpina1a |
| 106 | EDYPQFSSPK         | 1197.24 | 0.481644722 | -1.77 | 3.288475422 | Serpinf2  |
| 107 | EEDYPQFSSPK        | 1326.36 | 0.464828935 | -1.93 | 0.626132618 | Serpinf2  |
| 108 | EEPPSLRPAPPPISGGGY | 1820.98 | 0.584100317 | -0.84 | 0.519082584 | Fgb       |
| 109 | EEQLQIRAE          | 1243.32 | 0.422649731 | -1.54 | 1.90724169  | KRT10     |
| 110 | EETKQNEAFSLTAKG    | 1652.75 | 0.200950935 | -1.18 | 0.182416479 | C3        |
| 111 | EETKQNEAFSLTAKGKG  | 1837.97 | 0.198819379 | -1.29 | 0.296473069 | C3        |

|     |                      |         |             |       |             |           |
|-----|----------------------|---------|-------------|-------|-------------|-----------|
| 112 | EEVEGSLLLGSVQGYMEQAS | 2126.28 | 0.422649731 | -0.12 | 1.89274924  | Apoc3     |
| 113 | EEVGADLEQVEVLQ       | 1557.64 | 0.7933279   | -0.21 | 1.173299349 | Sptan1    |
| 114 | EFNAETFTFH           | 1242.29 | 0.422649731 | -0.49 | 0.609098328 | ALB       |
| 115 | EGYYGYTGAFR          | 1283.34 | 0.422649731 | -0.84 | 0.661516528 | TF        |
| 116 | ELQLSTGNGLFVNND      | 1620.71 | 0.374501337 | -0.33 | 1.485880601 | Serpina1a |
| 117 | EQLQDMGLVDFLSPEK     | 1849.06 | 0.422649731 | -0.46 | 0.531756015 | SERPINC1  |
| 118 | ETKQNEAFSLTAKGKG     | 1708.86 | 0.183573345 | -1.16 | 0.203211738 | C3        |
| 119 | ETKQNEAFSLTAKGKGR    | 1865.04 | 0.184352071 | -1.35 | 0.506429026 | C3        |
| 120 | EVDLPTEELQGLVPR      | 1694.87 | 0.266779804 | -0.43 | 3.359786269 | F13a1     |
| 121 | EVPLNTIIFMGR         | 1389.66 | 0.234334859 | 0.63  | 0.421142647 | SERPINC1  |
| 122 | EVQGFESATFLGYFK      | 1722.88 | 0.285967247 | 0.01  | 0.225172966 | GSN       |
| 123 | FGLEGDEESTMLEDSVSPK  | 2070.17 | 0.205229025 | -0.73 | 0.402520075 | Tln1      |
| 124 | FKDLGEENFK           | 1226.33 | 0.381197225 | -1.28 | 0.079522856 | ALB       |
| 125 | FQNALLVR             | 960.13  | 0.18950044  | 0.61  | 0.079029821 | ALB       |
| 126 | FQSGQVLSALPR         | 1302.47 | 0.265501667 | 0.11  | 2.168582838 | Cpb2      |
| 127 | FSALEVDETYVPK        | 1497.63 | 0.36977908  | -0.15 | 0.228347494 | ALB       |
| 128 | FSSLMNLEEKPAAPAA     | 1604.81 | 0.344516593 | -0.1  | 1.689051465 | Apoa2     |
| 129 | FVGGAENTAHPR         | 1255.33 | 0.201177857 | -0.6  | 0.339567165 | Igfbp5    |
| 130 | FYAPELFFAK           | 1345.58 | 0.27082555  | 0.85  | 0.188910505 | ALB       |
| 131 | GDFATRGPGSKAENPTNPGP | 1970.05 | 0.207890405 | -1.31 | 0.145212307 | Fga       |
| 132 | GDSRGDFA             | 823.8   | 0.791784695 | -1.06 | 1.206386065 | Fga       |
| 133 | GEDAAQAEKFQ          | 1193.21 | 0.880067318 | -1.24 | 1.104565463 | Cavin2    |
| 134 | GEDAAQAEKFQHPN       | 1541.57 | 0.185333553 | -1.56 | 0.219101373 | Cavin2    |
| 135 | GEDAAQAEKFQHPNT      | 1642.67 | 0.0585397   | -1.51 | 0.519489356 | Cavin2    |
| 136 | GEDAAQAEKFQHPNTD     | 1757.76 | 0.211900123 | -1.63 | 0.515929665 | Cavin2    |
| 137 | GEDAAQAEKFQHPNTDML   | 2002.11 | 0.422649731 | -1.13 | 0.625868424 | Cavin2    |
| 138 | GEFLSEGGGV           | 950.98  | 0.996201104 | 0.14  | 1.00295768  | Fga       |
| 139 | GETSSRVLLAGAPQTSQ    | 1701.82 | 0.422649731 | -0.34 | 0.654626016 | Lox11     |
| 140 | GFEPTLEALFGK         | 1308.47 | 0.184834043 | 0.08  | 0.362862556 | Apob      |

|     |                               |         |             |       |             |        |
|-----|-------------------------------|---------|-------------|-------|-------------|--------|
| 141 | GFRELACDDPEAEQVA              | 1749.84 | 0.665954947 | -0.55 | 0.646470994 | Ahsg   |
| 142 | GGGGGGGLGSGGSIR               | 1145.18 | 0.422649731 | -0.12 | 5.758714794 | KRT9   |
| 143 | GGGGGGGLGSGGSIRSS             | 1319.33 | 0.422649731 | -0.2  | 2.852356546 | KRT9   |
| 144 | GGGGGGLGSGGSIR                | 988.99  | 0.422649731 | 0.19  | 1.956143231 | KRT9   |
| 145 | GGPGPLTLKEVEELE               | 1567.73 | 0.460675245 | -0.49 | 0.577602138 | Zyx    |
| 146 | GGVAPQALAVAASGPGSSF           | 1643.79 | 0.089081678 | 0.7   | 2.385792563 | Pzp    |
| 147 | GLPAGALPLAGPPR                | 1286.52 | 0.595708612 | 0.34  | 1.324714    | Ltbp1  |
| 148 | GLSDHRTYH                     | 1085.12 | 0.1918013   | -1.53 | 0.111268761 | Ahsg   |
| 149 | GPEGPPGEPGPPGPP               | 1338.41 | 0.122534283 | -1.45 | 0.494855275 | Col5a2 |
| 150 | GPGSKAENPTNPGP                | 1322.37 | 0.154330199 | -1.55 | 1.70021425  | Fga    |
| 151 | GSEMVVAGKLQDQGPVLL            | 1956.21 | 0.422649731 | 0.14  | 1.603296551 | Itih4  |
| 152 | GSEMVVAGKLQDQGPVLLA           | 2027.29 | 0.504067074 | 0.23  | 1.356348966 | Itih4  |
| 153 | GSGGGSSGGSIGGR                | 1092.07 | 0.751891753 | -0.46 | 0.813929235 | KRT1   |
| 154 | GSGGGSYGSGGGGGHGSY            | 1514.42 | 0.763766776 | -0.73 | 1.256716999 | KRT1   |
| 155 | GSKAENPTNPGP                  | 1168.21 | 0.003380179 | -1.64 | 40.51339691 | Fga    |
| 156 | GVAPQALAVAASGPGSSF            | 1586.73 | 0.116765996 | 0.76  | 1.895538433 | Pzp    |
| 157 | HPDYSVLLLLR                   | 1311.52 | 0.286021356 | 0.45  | 0.184727908 | ALB    |
| 158 | HPYFYAPELLFFAK                | 1743    | 0.392485783 | 0.23  | 0.317082859 | ALB    |
| 159 | HQADSPRV                      | 908.95  | 0.422649731 | -1.39 | 5.143249316 | Flg    |
| 160 | HQTVPQNTGGK                   | 1166.24 | 0.422649731 | -1.56 | 0.318818089 | TF     |
| 161 | HREGETRNT                     | 1099.11 | 0.194784601 | -2.72 | 5.713263052 | Fga    |
| 162 | HSTIFENLANK                   | 1273.39 | 0.422649731 | -0.56 | 0.335780833 | TF     |
| 163 | IAEVENDEMPADLPSLAADFVESK      | 2590.79 | 0.422649731 | -0.18 | 0.719426259 | ALB    |
| 164 | ILTEQNQDQPEDDFI               | 1804.85 | 0.871895928 | -1.21 | 1.164606844 | Srgn   |
| 165 | ILTEQNQDQPEDDFII              | 1918.01 | 0.486280714 | -0.86 | 0.460565663 | Srgn   |
| 166 | IMNGEADAMSLDGGFVYIAGK         | 2159.43 | 0.307718127 | 0.35  | 0.029260435 | TF     |
| 167 | IPMQACQQKDVFASYLNSNIQSPS<br>M | 2801.16 | 0.422649731 | -0.26 | 57.6418586  | Zcche8 |
| 168 | ISHELESSSEVN                  | 1417.42 | 0.173589012 | -0.67 | 1.71955747  | Spp1   |

|     |                               |         |             |       |             |          |
|-----|-------------------------------|---------|-------------|-------|-------------|----------|
| 169 | KEEPPSLRPAPPISGGGY            | 1949.16 | 0.331758492 | -1    | 0.097699185 | Fgb      |
| 170 | KGEFLSEGGG                    | 980.02  | 0.721346064 | -0.67 | 0.727221231 | Fga      |
| 171 | KGEFLSEGGGV                   | 1079.15 | 0.939865177 | -0.23 | 1.021644494 | Fga      |
| 172 | KMADEAGSEAH                   | 1145.19 | 0.993731657 | -1.05 | 0.993777088 | Fga      |
| 173 | KNPLPSKETIEQEKQAGES           | 2113.27 | 0.196250812 | -1.68 | 0.054909855 | Tmsb4x   |
| 174 | KTETQEKNPLPSKETIEQEKQAGE<br>S | 2830    | 0.186456252 | -1.91 | 0.061744593 | Tmsb4x   |
| 175 | KVKDENNVVAQPQ                 | 1468.6  | 0.527182098 | -1.23 | 0.856056253 | Azgp1    |
| 176 | KVPQVSTPTLVEVSR               | 1639.88 | 0.323490036 | -0.07 | 0.191721759 | ALB      |
| 177 | LAETEGRYCVQ                   | 1268.39 | 0.422649731 | -0.46 | 1.513650995 | KRT10    |
| 178 | LALDIEIATYR                   | 1277.46 | 0.606570923 | 0.61  | 0.597754954 | KRT1     |
| 179 | LASVSTVLTSKYR                 | 1424.63 | 0.422649731 | 0.33  | 0.576678802 | Hba      |
| 180 | LDELRDEGK                     | 1074.14 | 0.265665868 | -1.69 | 0.132410671 | ALB      |
| 181 | LDFTGNLIEDIEDGTFK             | 2014.13 | 0.422649731 | -0.32 | 0.59882478  | Ogn      |
| 182 | LDNQDFGDHATL                  | 1345.36 | 0.864789029 | -0.8  | 1.079747202 | Serpinf2 |
| 183 | LEDELEPDPR                    | 1212.25 | 0.828323542 | -1.76 | 1.144116937 | Proc     |
| 184 | LEGDDDSRMEEVD                 | 1610.6  | 0.422649731 | -1.5  | 0.313802554 | Hsp90aa1 |
| 185 | LGMFLYEYAR                    | 1262.47 | 0.422649731 | 0.31  | 0.558718149 | ALB      |
| 186 | LGPLVEQGRQ                    | 1096.23 | 0.903545848 | -0.56 | 0.919645106 | Apoe     |
| 187 | LHLPADDVVSIIIEVEE             | 1907.07 | 0.422649731 | 0.26  | 0.473298344 | Vgf      |
| 188 | LLVVPWTQR                     | 1274.5  | 0.422649731 | 0.35  | 0.094702176 | HBB      |
| 189 | LVAASQAALGL                   | 1013.18 | 0.502379513 | 1.65  | 0.252139902 | ALB      |
| 190 | LVNEVTEFAK                    | 1149.29 | 0.286744671 | 0.17  | 0.129586464 | ALB      |
| 191 | MADEAGSEAHREGET               | 1589.59 | 0.771087323 | -1.35 | 1.08633369  | Fga      |
| 192 | MADEAGSEAHREGETRNT            | 1960.98 | 0.00276285  | -1.61 | 0.444628415 | Fga      |
| 193 | MDHYDSQQTND                   | 1353.32 | 0.338030355 | -2.28 | 0.596299655 | Actn1    |
| 194 | MDNLSPEEVQL                   | 1274.39 | 0.213882684 | -0.56 | 1.715716165 | Snap23   |
| 195 | MDNLSPEEVQLRA                 | 1501.65 | 0.593591746 | -0.68 | 1.306352645 | Snap23   |
| 196 | MDSASQDINLN                   | 1207.26 | 0.422649731 | -0.65 | 1.498064696 | Tpd5212  |

|     |                       |         |             |       |             |           |
|-----|-----------------------|---------|-------------|-------|-------------|-----------|
| 197 | MEDIDQSSLVS           | 1223.3  | 0.242273294 | -0.18 | 0.725697089 | Rtn4      |
| 198 | MEDIDQSSLVSSS         | 1397.45 | 0.422649731 | -0.28 | 0.556115067 | Rtn4      |
| 199 | MEDIDQSSLVSSSA        | 1468.53 | 0.752757875 | -0.13 | 1.146053755 | Rtn4      |
| 200 | MEDSPTMVKV            | 1136.33 | 0.994298834 | -0.18 | 1.006315891 | Slc14a1   |
| 201 | MEDSPTMVKVDR          | 1407.6  | 0.530251441 | -0.82 | 0.687661492 | Slc14a1   |
| 202 | MEDVTLHIVE            | 1185.34 | 0.673010399 | 0.42  | 1.185998228 | Cavin1    |
| 203 | MEDVTLHIVERPY         | 1601.81 | 0.210762016 | -0.25 | 2.393025447 | Cavin1    |
| 204 | MEEDYPQFSSPK          | 1457.55 | 0.658275885 | -1.61 | 0.785964319 | Serpinf2  |
| 205 | MEIPVPVQPS            | 1096.29 | 0.440013711 | 0.22  | 0.544413156 | Hspb6     |
| 206 | MESVAAESSPALE         | 1320.41 | 0.465724726 | 0.06  | 1.238354064 | Prkag1    |
| 207 | MGGVAPQALAVAASGPGSSF  | 1774.98 | 0.422649731 | 0.76  | 1.584246237 | Pzp       |
| 208 | MQDEDDGYITL           | 1184.27 | 0.643667006 | -0.62 | 1.391227948 | Clec1b    |
| 209 | MQDEDDGYITLN          | 1298.37 | 0.311177407 | -0.88 | 0.831035462 | Clec1b    |
| 210 | MQSQESGVHY            | 1165.23 | 0.930527473 | -1.09 | 0.965556067 | Smim1     |
| 211 | MYLGYEYVTAIR          | 1478.7  | 0.369516976 | 0.27  | 0.204866577 | TF        |
| 212 | NAAEVDLPTEELQGLVP     | 1794.94 | 0.422649731 | -0.11 | 1.885525622 | F13a1     |
| 213 | NAAEVDLPTEELQGLVPR    | 1951.13 | 0.236690556 | -0.36 | 3.31122877  | F13a1     |
| 214 | NALAVERTASVQ          | 1258.37 | 0.541780014 | 0.09  | 1.373000065 | Cxcl5     |
| 215 | NDNDNIFLSPLSISTAFAMTK | 2299.54 | 0.422649731 | 0.04  | 0.711418636 | SERPINC1  |
| 216 | NELKATIDQNLEDL        | 1615.73 | 0.422649731 | -0.81 | 0.647562143 | Apoa4     |
| 217 | NHAASRVAPDVTGSEVPGP   | 1958.08 | 0.518912923 | -0.49 | 0.636126912 | Creb3l3   |
| 218 | NPDQPPKPGM            | 1080.21 | 0.691009842 | -1.93 | 1.339692817 | Fgg       |
| 219 | NPLPSKETIEQEKQAGES    | 1985.1  | 0.187387133 | -1.56 | 0.231015876 | Tmsb4x    |
| 220 | NQDQPEDDFII           | 1333.35 | 0.463626897 | -1.3  | 1.604128055 | Srgn      |
| 221 | PADLPSLAADFVESK       | 1559.71 | 0.422649731 | 0.05  | 0.468675774 | ALB       |
| 222 | PDPAKSAPAPK           | 1078.21 | 0.422649731 | -1.19 | 0.263163323 | Hist2h2bb |
| 223 | PEDQPTPAIES           | 1183.21 | 0.192929918 | -1.27 | 0.485693468 | Apoc3     |
| 224 | PELLFFAK              | 964.15  | 0.403612429 | 0.75  | 0.479090431 | ALB       |
| 225 | PEPAKSAPAPK           | 1092.24 | 0.443162302 | -1.19 | 0.625682234 | H2bc7     |



|     |                     |         |             |       |             |           |
|-----|---------------------|---------|-------------|-------|-------------|-----------|
| 226 | PEPAKSAPAPKKGS      | 1364.54 | 0.422649731 | -1.3  | 0.595685853 | H2bc7     |
| 227 | PEPSKSAPAPK         | 1108.24 | 0.226274418 | -1.43 | 0.361918032 | H2bc3     |
| 228 | PEPTKSAPAPK         | 1122.27 | 0.497972325 | -1.42 | 0.48335109  | H2bc14    |
| 229 | PIITPVAQENQ         | 1209.34 | 0.24381187  | -0.26 | 0.383720774 | ApoE      |
| 230 | PNIVPDGDFSSLV       | 1359.47 | 0.422649731 | 0.29  | 1.897808733 | C4b       |
| 231 | PPASVVVGPVVVPR      | 1372.65 | 0.422649731 | 1.06  | 1.837326121 | Ahsg      |
| 232 | PSLAADFVESK         | 1163.27 | 0.422649731 | 0.03  | 0.60372837  | ALB       |
| 233 | PYFYAPELFFAK        | 1605.86 | 0.422649731 | 0.49  | 0.494243347 | ALB       |
| 234 | QAQEQVQPKPLES       | 1481.6  | 0.687520931 | -1.47 | 0.753637287 | Apoa4     |
| 235 | QNEAFSLTAK          | 1108.2  | 0.252487214 | -0.57 | 1.714241696 | C3        |
| 236 | QSGQVLSALPR         | 1155.3  | 0.834173008 | -0.14 | 0.877041654 | Cpb2      |
| 237 | QTALVELVK           | 1000.08 | 0.225037737 | 0.69  | 0.168317656 | ALB       |
| 238 | QVYYNPDQPPKP        | 1445.57 | 0.422649731 | -1.89 | 1.700131291 | Fgg       |
| 239 | RGEAAEGPAAAA        | 1070.11 | 0.422649731 | -0.26 | 1.495529841 | Gdf11     |
| 240 | RHPDYSVLLLLR        | 1467.71 | 0.249112736 | 0.03  | 0.184688925 | ALB       |
| 241 | RHPYFYAPELFFAK      | 1899.19 | 0.878085864 | -0.09 | 0.931047464 | ALB       |
| 242 | RLLWENG             | 1001.09 | 0.924858119 | -1.09 | 1.091154967 | C3        |
| 243 | RLLWENGLL           | 1227.41 | 0.007002316 | -0.11 | 9.890498207 | C3        |
| 244 | RVNSGFE             | 807.85  | 0.017346253 | -0.81 | 4.659368181 | Spp2      |
| 245 | SAEREAEEAATVA       | 1275.31 | 0.573153332 | -0.12 | 0.754648002 | Vat1      |
| 246 | SASDLTWDNLK         | 1249.32 | 0.422649731 | -0.75 | 0.472776303 | TF        |
| 247 | SCRQFSSS            | 900.95  | 0.334426898 | -0.74 | 5.29055752  | KRT9      |
| 248 | SDAAVDTSSSEITTKDL   | 1652.7  | 0.422649731 | -0.39 | 0.68483677  | Ptma      |
| 249 | SDEFSLADALPEQS      | 1508.53 | 0.186914953 | -0.54 | 0.409753008 | Mapk1ip11 |
| 250 | SDSGALGQHV          | 969.99  | 0.422649731 | -0.28 | 0.433065229 | Septin2   |
| 251 | SDTPASTFGG          | 938.93  | 0.588827821 | -0.43 | 1.7164544   | F13a1     |
| 252 | SDTPASTFGGR         | 1095.11 | 0.367050287 | -0.8  | 2.486101382 | F13a1     |
| 253 | SEAAPAAPAAAPPAEKAPA | 1687.84 | 0.032944283 | -0.09 | 0.318576992 | H1-2      |
| 254 | SEETKQNEAF          | 1182.19 | 0.53588239  | -1.83 | 1.372203793 | C3        |

|     |                     |         |             |       |             |           |
|-----|---------------------|---------|-------------|-------|-------------|-----------|
| 255 | SEETKQNEAFS         | 1269.26 | 0.343368483 | -1.74 | 1.370847272 | C3        |
| 256 | SEETKQNEAFSL        | 1382.42 | 0.92743643  | -1.28 | 1.10979013  | C3        |
| 257 | SEETKQNEAFSLTA      | 1554.6  | 0.219941406 | -1.01 | 0.540687735 | C3        |
| 258 | SEETKQNEAFSLTAK     | 1682.77 | 0.65153056  | -1.21 | 0.754251395 | C3        |
| 259 | SEETKQNEAFSLTAKG    | 1739.82 | 0.064677788 | -1.16 | 0.196904528 | C3        |
| 260 | SEETKQNEAFSLTAKGK   | 1867.99 | 0.268960374 | -1.32 | 0.26939191  | C3        |
| 261 | SEETKQNEAFSLTAKGKG  | 1925.05 | 0.135954296 | -1.27 | 0.206595541 | C3        |
| 262 | SEETKQNEAFSLTAKGKGR | 2081.23 | 0.19710834  | -1.44 | 0.07215006  | C3        |
| 263 | SEFGDSSSPATR        | 1240.22 | 0.433113801 | -1.07 | 1.51845544  | Fga       |
| 264 | SELEQLRQAEQL        | 1572.66 | 0.422649731 | -1.28 | 1.700125176 | Gnb4      |
| 265 | SELQLSTGNGLFVNND    | 1707.78 | 0.659910146 | -0.36 | 1.25467273  | Serpina1a |
| 266 | SETAPAAPAAPAPAEKTPV | 1775.94 | 0.34385387  | -0.23 | 1.718525067 | H1-4      |
| 267 | SGGGGGGGLGSGGSIR    | 1232.25 | 0.539697736 | -0.16 | 2.048706221 | KRT9      |
| 268 | SGQVLSALPR          | 1027.17 | 0.509363698 | 0.2   | 2.346007837 | Cpb2      |
| 269 | SGTLESIPDK          | 1046.12 | 0.619383981 | -0.69 | 1.226999405 | Apoc1     |
| 270 | SHELESSSEVN         | 1304.26 | 0.38222984  | -1.1  | 0.565624303 | Spp1      |
| 271 | SKAENPTNPGP         | 1111.16 | 0.957576552 | -1.75 | 1.037547201 | Fga       |
| 272 | SKETIEQEQAGES       | 1563.61 | 0.190543936 | -1.8  | 0.072571265 | Tmsb4x    |
| 273 | SLHTLFGDK           | 1017.13 | 0.339390181 | -0.23 | 0.076154927 | ALB       |
| 274 | SLKDTTEKE           | 1050.11 | 0.422649731 | -1.86 | 2.625563305 | F2        |
| 275 | SLKDTTEKELLDYIDG    | 1927.05 | 0.422649731 | -0.83 | 0.496477565 | F2        |
| 276 | SLMNLEEKPAAPAA      | 1370.56 | 0.890133004 | -0.27 | 1.07572275  | Apoa2     |
| 277 | SNAAEVDLPTEELQGLVPR | 2038.2  | 0.185040253 | -0.38 | 2.588454772 | F13a1     |
| 278 | SPVPDLVPGSF         | 1114.24 | 0.001830638 | 0.43  | 4.668724069 | Fga       |
| 279 | SQIPRLGDAVRA        | 1282.44 | 0.18520811  | -0.23 | 0.061783237 | Itih4     |
| 280 | SQIPRLGDAVRAS       | 1369.52 | 0.341856591 | -0.27 | 0.412737868 | Itih4     |
| 281 | SRSGGGGGGGLGSGGS    | 1206.17 | 0.422649731 | -0.49 | 2.845445088 | KRT9      |
| 282 | SRSGGGGGGGLGSGGSI   | 1319.33 | 0.422649731 | -0.2  | 1.802336798 | KRT9      |
| 283 | SRSGGGGGGGLGSGGSIR  | 1475.52 | 0.903452562 | -0.44 | 1.109417236 | KRT9      |

|     |                              |         |             |       |             |       |
|-----|------------------------------|---------|-------------|-------|-------------|-------|
| 284 | SRSGGGGGGGLGSGGSIRSS         | 1649.67 | 0.422649731 | -0.48 | 2.634227849 | KRT9  |
| 285 | SRSGGGGGGGLGSGGSIRSSY        | 1812.84 | 0.422649731 | -0.51 | 0.330576903 | KRT9  |
| 286 | SSGSVGESSKGP                 | 1165.16 | 0.422649731 | -0.83 | 3.381062503 | KRT10 |
| 287 | SSLMNLEEKAPAA                | 1457.64 | 0.849889372 | -0.31 | 1.107613402 | Apoa2 |
| 288 | SSTQFNKGPS                   | 1052.09 | 0.957012075 | -1.32 | 1.027120217 | Cnn2  |
| 289 | STVKKQVTKTY                  | 1282.48 | 0.04973525  | -1    | 7.737387559 | Fga   |
| 290 | STVLTSKYR                    | 1054.19 | 0.422649731 | -0.52 | 0.239018911 | Hba   |
| 291 | SVASTVWTTDTEDKGEFLSEGGG<br>V | 2472.55 | 0.422649731 | -0.34 | 0.076267388 | Fga   |
| 292 | SVESASGETLH                  | 1116.13 | 0.032083275 | -0.35 | 0.201934053 | Ahsg  |
| 293 | SVTVQETKE                    | 1020.08 | 0.205875249 | -0.91 | 0.82379915  | Knq1  |
| 294 | SVTVQETKEG                   | 1077.14 | 0.057448683 | -0.86 | 2.306085812 | Knq1  |
| 295 | SVTVQETKEGR                  | 1233.32 | 0.055779337 | -1.19 | 0.311891634 | Knq1  |
| 296 | SVVVGPPVVPR                  | 1107.34 | 0.912909682 | 1.48  | 1.038771627 | Ahsg  |
| 297 | TAGWNIPMGLLYNK               | 1577.84 | 0.284450813 | -0.03 | 0.12195738  | TF    |
| 298 | TDAEFHTFF                    | 1114.16 | 0.443616912 | -0.16 | 1.898197956 | F2    |
| 299 | TDAEFHTFFNE                  | 1357.37 | 0.796233968 | -0.76 | 0.85660733  | F2    |
| 300 | TDLEDELEPDPR                 | 1428.44 | 0.329506979 | -1.82 | 1.929784943 | Proc  |
| 301 | TDTEDKGEF                    | 1041.02 | 0.305410364 | -1.88 | 1.286431076 | Fga   |
| 302 | TDTEDKGEFL                   | 1154.17 | 0.862446723 | -1.31 | 0.865026988 | Fga   |
| 303 | TDTEDKGEFLSE                 | 1370.36 | 0.14256587  | -1.45 | 2.71091579  | Fga   |
| 304 | TDTEDKGEFLSEGG               | 1484.46 | 0.158405743 | -1.3  | 1.713304498 | Fga   |
| 305 | TDTEDKGEFLSEGGG              | 1541.51 | 0.688489064 | -1.24 | 0.766749537 | Fga   |
| 306 | TDTEDKGEFLSEGGGV             | 1640.65 | 0.689510891 | -0.9  | 0.925486736 | Fga   |
| 307 | TDTEDKGEFLSEGGGVR            | 1796.83 | 0.040558755 | -1.11 | 2.013953418 | Fga   |
| 308 | TDTEDKGEFLSEGGGVRGP          | 1951    | 0.422649731 | -1.1  | 0.617601607 | Fga   |
| 309 | TDVETTYADFIASGR              | 1645.71 | 0.597297206 | -0.3  | 0.532322037 | Pkia  |
| 310 | TEDKGEF                      | 824.83  | 0.422649731 | -1.81 | 58.64255869 | Fga   |
| 311 | TEDKGEFLSEGGGV               | 1424.46 | 0.471786062 | -0.73 | 1.20861703  | Fga   |

|     |                         |         |             |       |             |         |
|-----|-------------------------|---------|-------------|-------|-------------|---------|
| 312 | TEDKGEFLSEGGGVR         | 1580.64 | 0.787811359 | -0.98 | 0.9169258   | Fga     |
| 313 | TEEKDPKKL               | 1087.22 | 0.422649731 | -2.3  | 0.360388951 | Fyb1    |
| 314 | TEELQGLVPR              | 1141.27 | 0.777290611 | -0.59 | 0.872845577 | F13a1   |
| 315 | TEGAELVDSVLDVV          | 1445.56 | 0.422649731 | 0.74  | 1.639686331 | Tubb4b  |
| 316 | TEKDAQPLEEADDDLSKLN     | 2374.41 | 0.343426457 | -1.64 | 0.537648592 | Arhgdib |
| 317 | TEKDAQPLEEADDDLSKLN     | 2537.58 | 0.422649731 | -1.62 | 0.722265704 | Arhgdib |
| 318 | TEQNQDQPEDDFII          | 1691.69 | 0.422649731 | -1.57 | 0.655893816 | Srgn    |
| 319 | TETQKNPLPSKETIEQEQAGES  | 2701.83 | 0.26416482  | -1.83 | 0.219019482 | Tmsb4x  |
| 320 | TIEQEQAGES              | 1219.25 | 0.185857233 | -1.55 | 0.287519914 | Tmsb4x  |
| 321 | TKQNEAFSLTAKGKG         | 1579.74 | 0.422649731 | -1    | 0.227425051 | C3      |
| 322 | TLEIPGSSDPNIVP          | 1438.57 | 0.325412189 | -0.07 | 2.746129523 | C4b     |
| 323 | TLEIPGSSDPNIVPDGDFSS    | 2047.12 | 0.059065803 | -0.36 | 3.263580916 | C4b     |
| 324 | TLEIPGSSDPNIVPDGDFSSLV  | 2259.41 | 0.312866335 | 0.04  | 4.823202711 | C4b     |
| 325 | TLEIPGSSDPNIVPDGDFSSLVR | 2415.59 | 0.422649731 | -0.16 | 6.246500863 | C4b     |
| 326 | TLPGSGATVAGTLLR         | 1413.61 | 0.549997134 | 0.6   | 1.407986967 | F5      |
| 327 | TNAENEFVTIK             | 1265.36 | 0.422649731 | -0.55 | 2.791067707 | KRT1    |
| 328 | TNIEDPSSHVPEFSSSS       | 1819.82 | 0.422649731 | -0.85 | 1.567068805 | Fga     |
| 329 | TQEKPLPSKETIEQEQAGES    | 2471.61 | 0.422649731 | -1.8  | 0.270183037 | Tmsb4x  |
| 330 | TSRKKDPATK              | 1131.28 | 0.422649731 | -2.17 | 0.214761104 | Cpn1    |
| 331 | TTDAEFHTFFNE            | 1458.47 | 0.514149425 | -0.76 | 1.385609529 | F2      |
| 332 | TTDTEDKGEFLSEGGGV       | 1741.75 | 0.422649731 | -0.89 | 0.357446314 | Fga     |
| 333 | TTFRLLWENG              | 1236.37 | 0.422649731 | -0.38 | 0.374336157 | C3      |
| 334 | TVKKQVTKTY              | 1195.4  | 0.896425775 | -1.02 | 1.130563476 | Fga     |
| 335 | TVWTTDTEDKGEFLSEGGGV    | 2128.19 | 0.451440068 | -0.63 | 0.602179496 | Fga     |
| 336 | TYETTLEK                | 984.05  | 0.26588573  | -1.31 | 0.100069995 | ALB     |
| 337 | VANALAHKYH              | 1123.26 | 0.422649731 | -0.17 | 0.197951453 | HBB     |
| 338 | VAPEEHPVLLTEAPLNPK      | 1954.22 | 0.20122056  | -0.27 | 0.448840249 | Actb    |
| 339 | VDLEPTVIDEI             | 1242.36 | 0.422649731 | 0.45  | 0.577100457 | Tuba4a  |
| 340 | VDPTEELQGLVPR           | 1565.76 | 0.19130806  | -0.21 | 2.941798574 | F13a1   |

|     |                              |         |             |       |             |           |
|-----|------------------------------|---------|-------------|-------|-------------|-----------|
| 341 | VDVPAADLSDQVPDTSSET          | 1973.98 | 0.123708193 | -0.56 | 0.462616852 | C3        |
| 342 | VDVPAADLSDQVPDTSSETR         | 213.17  | 0.422649731 | -0.76 | 0.703881839 | C3        |
| 343 | VDVPAADLSDQVPDTSSETRILQ<br>G | 2654.82 | 0.422649731 | -0.25 | 2.048248015 | C3        |
| 344 | VFDEFKPLVEEPQNLIK            | 2045.32 | 0.330187472 | -0.35 | 0.147354863 | ALB       |
| 345 | VGGAENTAHR                   | 1108.16 | 0.422649731 | -0.91 | 0.379510436 | Igfbp5    |
| 346 | VGPAGKNGDRGET                | 1257.3  | 0.545056596 | -1.29 | 0.389358414 | Coll1a1   |
| 347 | VGPVVVPR                     | 822     | 0.014810775 | 1.09  | 4.910499179 | Ahsg      |
| 348 | VHLTPEEK                     | 952.06  | 0.422649731 | -1.05 | 0.545750266 | HBB       |
| 349 | VKDENVVAQPQ                  | 1340.43 | 0.422649731 | -1.01 | 2.53908682  | Azgp1     |
| 350 | VLGAFSDGLAHLNLK              | 1669.87 | 0.186071302 | 0.41  | 0.561445104 | HBB       |
| 351 | VLSGEDK                      | 746.8   | 0.424586775 | -0.59 | 2.195597481 | Hba       |
| 352 | VPDLVPGSF                    | 930.05  | 0.001438672 | 0.79  | 7.494879697 | Fga       |
| 353 | VPPNNSNAAEVDLPTTELQGLVPR     | 2559.77 | 0.346564252 | -0.55 | 1.55204139  | F13a1     |
| 354 | VPQVSTPTLVEVSR               | 1511.71 | 0.812080927 | 0.21  | 0.809964662 | ALB       |
| 355 | VQETDTSQKDQSPA               | 1533.54 | 0.422649731 | -1.68 | 0.517400779 | Serpina1a |
| 356 | VSTVLTSKYR                   | 1153.32 | 0.422649731 | -0.05 | 0.667247686 | Hba       |
| 357 | VVGPVVVPR                    | 921.13  | 0.436584258 | 1.43  | 0.799122615 | Ahsg      |
| 358 | VVVGPVVVPR                   | 1020.26 | 0.804315768 | 1.71  | 0.932557842 | Ahsg      |
| 359 | VYLIQGTQVYVFLTK              | 1772.08 | 0.308929225 | 0.81  | 0.207566698 | Hpx       |
| 360 | VYYNPDQPPKPGMIDSATQ          | 2121.31 | 0.135116704 | -1.05 | 5.172399311 | Fgg       |
| 361 | YAPELLFFAK                   | 1198.4  | 0.216442611 | 0.65  | 0.359850964 | ALB       |
| 362 | YDEPTDSLDA                   | 1125.09 | 0.957187222 | -1.28 | 0.959646439 | Fgb       |
| 363 | YDEPTSLDAR                   | 1281.27 | 0.361762458 | -1.57 | 1.80500521  | Fgb       |
| 364 | YEDEINKR                     | 1066.12 | 0.422649731 | -2.4  | 5.755999641 | KRT1      |
| 365 | YEDIAQKS                     | 953     | 0.233333821 | -1.28 | 5.563039383 | KRT1      |
| 366 | YFYAPELLFFAK                 | 1508.75 | 0.422649731 | 0.67  | 0.388296074 | ALB       |
| 367 | YGFRDPGPQL                   | 1149.25 | 0.718012699 | -1.02 | 0.662636281 | Chga      |
| 368 | YNPDQPPKPGMIDSATQ            | 1859.01 | 0.242651873 | -1.34 | 4.259158224 | Fgg       |

|     |            |         |             |      |             |      |
|-----|------------|---------|-------------|------|-------------|------|
| 369 | YWGVASFLQK | 1198.36 | 0.230621616 | 0.18 | 0.389544582 | RBP4 |
|-----|------------|---------|-------------|------|-------------|------|

### 3 Table S2

#### 4 Significantly differentiated peptide

| No. | Sequence                   | P-value     | Fold-change | Protein origin | Score     |
|-----|----------------------------|-------------|-------------|----------------|-----------|
| 6   | AATELRGVV                  | 0.024155158 | 1.414682434 | Osbp           | 0.123344  |
| 12  | ADEAGSEAHREGET<br>RNT      | 0.038844255 | 0.273751904 | Fga            | 0.118488  |
| 39  | AIQVYYNPDQPPKP<br>GMIDSATQ | 0.026910242 | 4.522386976 | Fgg            | 0.12735   |
| 155 | GSKAENPTNPGP               | 0.003380179 | 40.51339691 | Fga            | 0.411249  |
| 192 | MADEAGSEAHREG<br>ETRNT     | 0.00276285  | 0.444628415 | Fga            | 0.0940532 |
| 243 | RLLWENGNLL                 | 0.007002316 | 9.890498207 | C3             | 0.547936  |
| 244 | RVNSGFE                    | 0.017346253 | 4.659368181 | Spp2           | 0.231696  |
| 253 | SEAAPAAPAAAPPA<br>EKAPA    | 0.032944283 | 0.318576992 | H1-2           | 0.451463  |
| 278 | SPVPDLVPGSF                | 0.001830638 | 4.668724069 | Fga            | 0.776414  |
| 289 | STVKKQVTKTY                | 0.04973525  | 7.737387559 | Fga            | 0.0376532 |
| 292 | SVESASGETLH                | 0.032083275 | 0.201934053 | Ahsg           | 0.106249  |
| 307 | TDTEDKGEFLSEGG<br>GVR      | 0.040558755 | 2.013953418 | Fga            | 0.210199  |
| 347 | VGPVVVPR                   | 0.014810775 | 4.910499179 | Ahsg           | 0.273041  |
| 352 | VPDLVPGSF                  | 0.001438672 | 7.494879697 | Fga            | 0.635403  |

### 5 Table S3

#### 6 Physicochemical properties of peptides

| No. | Sequence     | Score    | GRAVY | IP   | Extinction coefficient                |
|-----|--------------|----------|-------|------|---------------------------------------|
| 155 | GSKAENPTNPGP | 0.411249 | -1.64 | 7.0  | 0 M <sup>-1</sup> cm <sup>-1</sup>    |
| 243 | RLLWENGNLL   | 0.547936 | -0.11 | 7.0  | 5690 M <sup>-1</sup> cm <sup>-1</sup> |
| 278 | SPVPDLVPGSF  | 0.776414 | 0.43  | 3.12 | 0 M <sup>-1</sup> cm <sup>-1</sup>    |

---

|     |           |          |      |      |                                    |
|-----|-----------|----------|------|------|------------------------------------|
| 352 | VPDLVPGSF | 0.635403 | 0.79 | 3.12 | 0 M <sup>-1</sup> cm <sup>-1</sup> |
|-----|-----------|----------|------|------|------------------------------------|

---

7
